# Supplementary material for: Associations between maternal characteristics and pharmaceutical treatment of gestational diabetes: an analysis of the UK Born in Bradford (BiB) cohort study
Source: PubMed Central journal article supplement (PMC8572403; doi:10.1136/bmjopen-2021-053753), 2021-11-03
Supplement: bmjopen-2021-053753.draft_revisions.pdf [file bmjopen-2021-053753.draft_revisions.pdf]

# BMJ Open

BMJ Open is committed to open peer review. As part of this commitment we make the peer review history of every article we publish publicly available.

When an article is published we post the peer reviewers' comments and the authors' responses online. We also post the versions of the paper that were used during peer review. These are the versions that the peer review comments apply to.

The versions of the paper that follow are the versions that were submitted during the peer review process. They are not the versions of record or the final published versions. They should not be cited or distributed as the published version of this manuscript.

BMJ Open is an open access journal and the full, final, typeset and author-corrected version of record of the manuscript is available on our site with no access controls, subscription charges or pay-per-view fees (<http://bmjopen.bmj.com>).

If you have any questions on BMJ Open's open peer review process please email [info.bmjopen@bmj.com](mailto:info.bmjopen@bmj.com)

# BMJ Open

## Pharmacological management of gestational diabetes and the introduction of metformin: an analysis of the UK Born in Bradford (BiB) cohort study

|                               |                                                                                                                                                                                                                          |
|-------------------------------|--------------------------------------------------------------------------------------------------------------------------------------------------------------------------------------------------------------------------|
| Journal:                      | <i>BMJ Open</i>                                                                                                                                                                                                          |
| Manuscript ID                 | bmjopen-2021-053753                                                                                                                                                                                                      |
| Article Type:                 | Original research                                                                                                                                                                                                        |
| Date Submitted by the Author: | 24-May-2021                                                                                                                                                                                                              |
| Complete List of Authors:     | Martine-Edith, Gilberte; Loughborough University, Johnson, William; Loughborough University Hunsicker, Eugenie; Loughborough University Hamer, Mark; University College London Petherick, Emily; Loughborough University |
| Keywords:                     | Diabetes in pregnancy < DIABETES & ENDOCRINOLOGY, EPIDEMIOLOGY, PUBLIC HEALTH                                                                                                                                            |
|                               |                                                                                                                                                                                                                          |

SCHOLARONE™  
Manuscripts

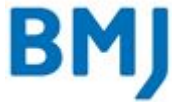

I, the Submitting Author has the right to grant and does grant on behalf of all authors of the Work (as defined in the below author licence), an exclusive licence and/or a non-exclusive licence for contributions from authors who are: i) UK Crown employees; ii) where BMJ has agreed a CC-BY licence shall apply, and/or iii) in accordance with the terms applicable for US Federal Government officers or employees acting as part of their official duties; on a worldwide, perpetual, irrevocable, royalty-free basis to BMJ Publishing Group Ltd ("BMJ") its licensees and where the relevant Journal is co-owned by BMJ to the co-owners of the Journal, to publish the Work in this journal and any other BMJ products and to exploit all rights, as set out in our [licence](#).

The Submitting Author accepts and understands that any supply made under these terms is made by BMJ to the Submitting Author unless you are acting as an employee on behalf of your employer or a postgraduate student of an affiliated institution which is paying any applicable article publishing charge ("APC") for Open Access articles. Where the Submitting Author wishes to make the Work available on an Open Access basis (and intends to pay the relevant APC), the terms of reuse of such Open Access shall be governed by a Creative Commons licence – details of these licences and which [Creative Commons](#) licence will apply to this Work are set out in our licence referred to above.

Other than as permitted in any relevant BMJ Author's Self Archiving Policies, I confirm this Work has not been accepted for publication elsewhere, is not being considered for publication elsewhere and does not duplicate material already published. I confirm all authors consent to publication of this Work and authorise the granting of this licence.

1  
2  
3 **Pharmacological management of gestational diabetes and the introduction of**  
4  
5 **metformin: an analysis of the UK Born in Bradford (BiB) cohort study**  
6  
7  
8  
9

10  
11 Gilberte Martine-Edith<sup>1</sup>, MSc, William Johnson<sup>1</sup>, PhD, Eugenie Hunsicker<sup>2</sup>, PhD, Mark  
12  
13 Hamer<sup>3</sup>, PhD, and Emily S Petherick<sup>1</sup>, PhD  
14  
15

16  
17  
18  
19  
20 <sup>1</sup>School of Sport, Exercise and Health Sciences, Loughborough University, Loughborough,  
21  
22 UK  
23

24  
25 <sup>2</sup>School of Science, Loughborough University, Loughborough, UK  
26

27  
28 <sup>3</sup>Institute of Sport, Exercise and Health, Division Surgery Interventional Science, University  
29  
30 College London, London, UK  
31  
32

33  
34  
35  
36 Corresponding author: William Johnson, School of Sport, Exercise and Health Sciences,  
37  
38 Loughborough University, Epinal Way, LE11 3TU, Loughborough, UK. E-mail:  
39

40  
41 [w.o.johnson@lboro.ac.uk](mailto:w.o.johnson@lboro.ac.uk)  
42  
43  
44  
45  
46  
47  
48  
49  
50  
51  
52  
53  
54  
55  
56  
57  
58  
59  
60

## Abstract

**Objectives** To identify maternal characteristics associated with pharmacological treatment of gestational diabetes mellitus (GDM) and explore the effects of metformin introduction.

**Methods** We investigated maternal records from 762 Born in Bradford cohort participants receiving GDM treatment. Univariate associations between maternal characteristics and GDM treatment (lifestyle changes vs pharmacological treatment) were examined using Mann-Whitney and Chi-square tests. Receiver operating curve analysis compared the prediction of pharmacological treatment between a minimal model (significant variables from univariate analysis) and a full model (variables selected through multivariable LASSO regression). In the period after metformin introduction, univariate associations between maternal characteristics and GDM treatment (lifestyle changes vs insulin vs metformin) were explored using Kruskal-Wallis and Chi-square tests.

**Results** Women prescribed pharmacological treatment were older (median: 31.7 years (interquartile range, IQR:7.6)), more hyperglycaemic, and had higher median BMI (28.4 (IQR:7.9)). LASSO-selected variables led to a 2.7% sensitivity and 4.3% specificity improvement in the prediction of pharmacological treatment. After metformin introduction, insulin was prescribed to the most hyperglycaemic women whilst metformin was prescribed to women with high BMI.

**Conclusions** Higher age, glucose levels and BMI were characteristic of GDM pharmacological management. Metformin introduction decreased insulin prescriptions for mothers with high BMI.

### Strengths and limitations of this study

- This study was based on a large sample of women diagnosed with GDM in a centre where universal GDM screening is in place.
- This study allowed for an exploration of the changes in GDM pharmacological treatment following metformin introduction.
- Our results may be biased by clinicians' preference for a specific treatment and patient compliance to treatment.

## Introduction

Gestational diabetes mellitus (GDM) is one of the most common complications of pregnancy [1]. In 2019, the International Diabetes Federation estimated that 13.2% of pregnancies, or 17 million live births, were affected by GDM worldwide [2]. The reported prevalence of GDM is 5% in the United Kingdom (UK) [3]. The public health significance of GDM lies in the intergenerational cycle of diabetes and obesity risk it perpetuates as GDM is associated with both maternal complications (e.g. pre-eclampsia, caesarean delivery) and health risks for the offspring (e.g. macrosomia, childhood obesity) [4].

Guidelines for initial GDM management recommend lifestyle changes (dietary and exercise advice) [5,6]. While these changes are largely effective, hyperglycaemia persists for 15-30% of women and supplemental pharmacological treatment is required [5]. Historically, subcutaneous insulin was the first-line pharmacological agent [5]. However, metformin has been increasingly accepted following the Metformin in Gestational diabetes (MiG) trial that validated it as a safe alternative to insulin [7], despite uncertainties regarding its long-term effects on offspring health [8]. In the UK, both the 2008 and 2015 National Institute for Health and Care Excellence (NICE) guidelines initially recommend metformin for GDM treatment and insulin is suggested when metformin is contraindicated, not tolerated or ineffective [6].

With the aim to inform clinical management of GDM, previous research has investigated the characteristics associated with failure of lifestyle changes to achieve euglycaemia and the subsequent need for supplemental pharmacological treatment in mothers with GDM [9–15]. High maternal body mass index (BMI), history of GDM, advanced age and adverse oral

1  
2  
3 glucose tolerance test (OGTT) were amongst factors increasing the probability of receiving  
4  
5 pharmacological treatment. However, most previous studies exclusively compared insulin to  
6  
7 lifestyle changes treatment [9–13] and with the limited number of UK studies[14–16], both  
8  
9 the effects of metformin introduction on GDM management and the characteristics of  
10  
11 pharmacologically treated women in the UK remain largely unknown.  
12  
13  
14  
15  
16  
17

18  
19 Using a UK birth cohort that included women with GDM treated both before and after  
20  
21 metformin introduction, this study aimed to (1) for the overall study period, identify the  
22  
23 maternal characteristics associated with GDM pharmacological treatment, (2) after metformin  
24  
25 introduction, compare maternal characteristics between lifestyle changes, insulin and  
26  
27 metformin treatment groups.  
28  
29  
30  
31  
32

## 33 **Methods**

### 34 Study

35  
36  
37  
38  
39 Born in Bradford (BiB) is a longitudinal prospective birth cohort study [17]. Bradford, a city  
40  
41 in the north of England, constitutes a multi-ethnic population of more than 500,000  
42  
43 individuals, with 20% of the population of South Asian origin. Data were collected between  
44  
45 2007 and 2010 from 12,453 women (and their partners and offspring) booked for delivery at  
46  
47 the Bradford Royal Infirmary [18]. Ethical approval for the study was granted by Bradford  
48  
49 Research Ethics Committee (Ref 07/H1302/112).  
50  
51  
52  
53  
54  
55  
56  
57  
58  
59  
60



### Patient and public involvement

Patients and/or the public were not involved in the design, conduct, reporting or dissemination plans of this research.

### Sample

Our sample comprised 762 women with data on maternal characteristics (Figure 1). Cohort participants diagnosed with GDM in a singleton pregnancy were included if they received (i) lifestyle changes advice only, (ii) lifestyle changes advice with supplementary insulin or (iii) lifestyle changes advice supplemented by metformin. We excluded GDM treatment combinations (e.g. lifestyle changes advice supplemented by both metformin and insulin treatment) that did not yield sufficient numbers for meaningful analyses to be conducted. Participants with GDM for whom treatment was not recorded were excluded. If mothers had more than one singleton pregnancy affected and treated for GDM during the study, we only included the first pregnancy. Singleton pregnancies not affected by GDM and higher order pregnancies (twins, triplets) whether or not affected by GDM were excluded from the study, as were women with pre-existing diabetes.

### Screening and diagnosis of GDM

All women enrolled in the BiB study were offered GDM screening. This was conducted between 26 and 28 weeks of gestation using the 2-hour 75g OGTT and 80% of women attended their appointment [18]. Diagnosis of GDM was made using the modified 1999 World Health Organisation (WHO) criteria in accordance with local recommendations at the

1  
2  
3 time of recruitment (fasting glucose concentration  $\geq 6.1$  mmol/L and/or 2-hour post-load  
4  
5 glucose  $\geq 7.8$  mmol/L) [19].  
6  
7  
8  
9

### 10 11 Management and treatment of GDM 12

13  
14 Local procedure meant that all women were referred to the joint obstetric diabetes clinic  
15 following a diagnosis of GDM. Women were educated in dietary and exercise changes and  
16 capillary glucose monitoring. Individualized dietary recommendations were provided by a  
17 dietician and daily walking for at least 30 minutes was recommended. If glucose targets were  
18 achieved after a week (fasting plasma glucose: 4.0-5.5 mmol/L; 2-hour postprandial:  
19  $\leq 7.5$  mmol/L), lifestyle changes were continued without additional pharmacological  
20 treatment. If hyperglycaemia persisted, treatment was supplemented with insulin injections  
21 until delivery in the first part of the study (04/2007-03/2009). Following metformin  
22 introduction (04/2009), both insulin injections and metformin tablets (850 mg, twice daily)  
23 were pharmacological prescription options.  
24  
25  
26  
27  
28  
29  
30  
31  
32  
33  
34  
35  
36  
37  
38  
39  
40

### 41 Study outcome: GDM treatment type 42

43  
44 The three reported treatment options evaluated in our study were: counselling for lifestyle  
45 changes, insulin and metformin. Lifestyle changes consisted of diet and exercise. Insulin and  
46 metformin groups included women who initially received lifestyle changes advice followed  
47  
48 by supplementary insulin and metformin treatment, respectively.  
49  
50  
51  
52  
53  
54  
55  
56  
57  
58  
59  
60

## Maternal characteristics

### *Socio-demographic characteristics*

Seven socio-demographic characteristics were considered: age at childbirth, marital and cohabitation status, ethnicity (White British, Pakistani, other), employment status (previously, currently, or never employed), migration status, educational levels, and parity. These were self-reported using interviewer-administered questionnaires at booking conducted in English or South Asian languages (e.g. Bengali, Punjabi). Ethnicity was grouped according to the UK Office of National Statistics guidelines [20]. Education levels corresponded to  $\leq$ five General Certificate of Secondary Education (GCSE) qualification, A level equivalent, higher than A level and other/unknown. Migration status was classified in two groups: mother was born in the UK or moved to the UK at  $\leq$ five years old and mother moved to the UK  $>$ five years of age. Marital and cohabitation status was defined as married and living with a partner, not married and living with a partner or not living with a partner.

### *Lifestyle and health characteristics*

Nine lifestyle and health variables were analysed: BMI at booking, smoking during pregnancy (yes/no), physical activity levels, family history of diabetes (yes/no), history of GDM before the study (yes/no), pre-existing hypertension (yes/no), gestational age and blood glucose concentrations at OGTT (fasting and 2-hour post-load) and start date of treatment relative to metformin introduction (before/after). Maternal BMI was obtained from height and weight measurements conducted at recruitment using Leicester Height Measure and SECA digital scales. Family history of diabetes, history of GDM and pre-existing hypertension were self-reported. Gestational age was recorded, and plasma glucose levels were measured at OGTT using a glucose oxidase method. Maternal physical activity levels (inactive,

1  
2  
3 moderately inactive, moderately active, active) were self-reported using the UK General  
4  
5 Practice Physical Activity Questionnaire [21].  
6  
7  
8  
9

### 10 11 Statistical analysis 12

13  
14 Analyses were based on two time periods to account for the fact that metformin was used for  
15  
16 GDM treatment in the study from April 2009 onwards.  
17  
18

19  
20  
21  
22 *Overall study period: 04/2007-02/2011*  
23

24  
25 Using the whole study sample, we considered two treatment types: lifestyle changes and  
26  
27 pharmacological treatment (i.e. insulin- and metformin-treated women were grouped).  
28

29  
30 Firstly, univariate associations between maternal characteristics and GDM treatment type  
31  
32 were explored using the Mann-Whitney U test for continuous variables and Chi-square (or  
33  
34 Fisher's exact) test for categorical variables. The Holm-Bonferroni correction adjusted for  
35  
36 multiple testing. Secondly, multivariable models were developed. A least absolute shrinkage  
37  
38 and selection operator (LASSO) binary regression model was fitted including all maternal  
39  
40 characteristics. The characteristics most predictive of pharmacological treatment were  
41  
42 selected by LASSO using a 10-fold cross-validation [22].  
43  
44  
45  
46  
47  
48  
49

50 We then compared two multivariable models. The minimal model included the variables that  
51  
52 have shown significance (accounting for multiple testing) following the univariate analysis  
53  
54 described above. The full model comprised the LASSO-selected variables. We evaluated if  
55  
56 the full model would improve the prediction of pharmacological treatment using a receiver  
57  
58 operating characteristics (ROC) curve analysis. Area under the ROC curve (AUC),  
59  
60

1  
2  
3 specificity, sensitivity, positive predictive value (PPV) and negative predictive value (NPV)  
4  
5 were calculated. The optimal cut-off point was defined as the point of maximum sensitivity  
6  
7 and specificity, where the ROC curve was closest to the upper left corner. Additionally, the  
8  
9 fit of the two models was evaluated using a Chi-square difference test.  
10  
11  
12  
13  
14  
15

16 *Period after metformin introduction: 04/2009-02/2011*  
17  
18

19 Using the subsample of women who started GDM treatment after metformin introduction, we  
20  
21 considered three treatment types: lifestyle changes, insulin, and metformin. Univariate  
22  
23 associations between LASSO-selected maternal characteristics and GDM treatment type were  
24  
25 examined. The Kruskal-Wallis test was used for continuous variables and the Chi-square (or  
26  
27 Fisher's exact) test was used for categorical variables. The Holm-Bonferroni correction  
28  
29 adjusted for multiple testing. Further subsample analysis assessed if metformin introduction  
30  
31 was associated with changes in the maternal characteristics of women receiving insulin.  
32  
33  
34  
35  
36  
37  
38

39 Analyses were conducted using R (R 3.4.1 & R Studio 1.0.153 for Windows) and Stata/SE  
40  
41 software (Stata/SE 15 for Windows; StataCorp, College Station, TX, USA).  
42  
43  
44  
45  
46

## 47 **Results**

48  
49

50 A total of 844 women were diagnosed with GDM in a singleton pregnancy. We excluded 82  
51  
52 women who did not meet our treatment inclusion criteria, leading to a sample of 762 women  
53  
54 (Figure 1).  
55  
56  
57  
58  
59  
60

### Overall study period: lifestyle changes vs pharmacological treatment

32% of women received lifestyle changes advice alone and 68% received supplemental pharmacological treatment during the study (Table 1). Compared to women receiving lifestyle changes advice, women who had pharmacological treatment were older at childbirth (median age: 31.7 years (interquartile range, IQR: 7.6) vs 29.9 years (8.1)), more hyperglycaemic at OGTT and had higher obesity rates (41.7% vs 19.0%). Mothers in the pharmacological treatment group were also more likely to be smokers, have a history of GDM and family history of diabetes. Differences in age, BMI and glucose concentrations at OGTT between lifestyle changes and pharmacological treatment groups remained significant after accounting for multiple testing (Table 1).

The first variables selected through LASSO regression analysis were BMI at booking, glucose concentrations at OGTT and age at childbirth (Supplementary Table 1). These selected variables were the same as the maternal characteristics shown, in the univariate analyses, to be significantly associated with pharmacological treatment after adjusting for multiple testing (as described above). LASSO also selected smoking, physical activity, family history of diabetes, gestational age at OGTT, employment status, ethnicity, parity and education as predictors of pharmacological treatment in women with GDM (Supplementary Table 1).

ROC analysis showed that the AUC of the full model including the LASSO-selected characteristics (0.8) was greater than the AUC of the minimal model including age, BMI and glucose concentrations at OGTT (0.7). At the optimal cut-off point, the full model was associated with a 2.7% sensitivity improvement (72.4% vs 69.7% in the minimal model) and

1  
2  
3 a 4.3% specificity improvement (69.2% vs 64.9%). PPV and NPV were higher for the full  
4 model (PPV: 82.5%; NPV: 55.6%) than the minimal model (PPV: 79.9%; NPV: 51.7%). The  
5  
6 significance of the Chi-square difference test ( $p=0.004$ ) confirmed that the variables included  
7  
8 in the full model, rather than the minimal model, provided a better fit for pharmacological  
9  
10 treatment prediction.  
11  
12  
13  
14  
15  
16  
17

### 18 Period after metformin introduction: lifestyle changes vs insulin vs metformin treatment

19  
20  
21 After metformin introduction, 396 women received GDM treatment (Table 2). Of these,  
22  
23 31.1%, 50.5% and 18.4% respectively received lifestyle changes advice, insulin and  
24  
25 metformin treatment. Mothers in the lifestyle changes group were more likely to be younger,  
26  
27 less hyperglycaemic and have a lower BMI. Women who were prescribed metformin had the  
28  
29 highest median BMI (29.3 (IQR:6.5)) while insulin prescription was mostly provided to older  
30  
31 mothers (highest median age: 31.8 years (IQR:8.2)) and those more hyperglycaemic at OGTT  
32  
33 (Table 2).  
34  
35  
36  
37  
38  
39  
40

41 After metformin introduction, there was a decrease in the proportion of insulin-treated  
42  
43 overweight (before:69.9%; after:45.1%) and obese women (before:77.5%; after:61.6%)  
44  
45 (Supplementary Table 2). The rates of overweight and obese women treated with metformin  
46  
47 reached 19.5% and 24.8%, respectively. Age at childbirth and median glucose concentrations  
48  
49 at OGTT of insulin-treated mothers remained relatively unchanged following metformin  
50  
51 introduction (Supplementary Table 2).  
52  
53  
54  
55  
56  
57  
58  
59  
60

## Discussion

Our study showed that pharmacologically treated women with GDM were older, more obese and hyperglycaemic than mothers receiving lifestyle changes advice. Factors such as ethnicity, smoking and parity may also be associated with pharmacological treatment. Metformin introduction did not, at the time of the study, radically change GDM pharmacological management as most women were still prescribed insulin. However, after metformin introduction, women with high BMI formerly treated with insulin were subsequently treated with metformin while the most hyperglycaemic women were consistently prescribed insulin.

Supplemental pharmacological treatment was the most common form of GDM management in our study. This contrasted with previous studies in which mothers with GDM were more frequently managed with lifestyle changes advice [9,11–14,23–25]. These disparities could be due to differences in GDM diagnostic criteria: the modified 1999 WHO criteria in our study used higher fasting glucose thresholds at OGTT but lower 2-hour thresholds than other criteria in by previous studies [9,13,25]. We hypothesise that the larger representation of South Asian women (notably Pakistani (59%)) in our study compared to previous work [9,14] also contributed to the higher pharmacological treatment rates in our sample as Pakistani women are generally more likely to develop GDM and prone to more severe hyperglycaemia [26]. Finally, the high levels of deprivation in Bradford and the presence of non-English-speaking communities [18] could have limited health literacy and the adherence to lifestyle changes advice [27] in our sample, leading to a greater pharmacological treatment risk.



1  
2  
3 Advanced maternal age, obesity and severe hyperglycaemia were the most important  
4 characteristics associated with pharmacological treatment of any kind, as shown by both  
5 univariate and multivariable analyses. Our results were in line with previous evidence,  
6 including from large international population studies [9,12,13], showing that  
7 pharmacologically treated women tend to have poorer health characteristics than women  
8 receiving lifestyle changes advice alone [9,11–13,23–25]. For instance, the study by Zhang *et*  
9 *al.* [13] highlighted that clinical factors such as higher glucose levels at OGTT increased the  
10 risk of insulin treatment whilst Gonzalez-Quintero *et al.* [12] demonstrated that pre-  
11 gestational obesity and history of GDM, amongst other factors, were determinant of insulin  
12 requirement. Thus, despite the specifics of the BiB cohort described previously, we have  
13 shown that pharmacologically treated mothers in our sample and previous studies shared  
14 similar key characteristics. It seems that regardless of study location, screening methods and  
15 diagnostic criteria, there is a group of women with GDM with one or a combination of  
16 clinical risk factors that increase their likelihood of requiring pharmacological intervention to  
17 achieve euglycaemia.  
18  
19  
20  
21  
22  
23  
24  
25  
26  
27  
28  
29  
30  
31  
32  
33  
34  
35  
36  
37  
38  
39  
40

41 Additional socio-demographic and lifestyle characteristics such as smoking, ethnicity and  
42 parity improved model fit for the prediction of pharmacological treatment as demonstrated by  
43 the ROC analysis. This suggests that, in addition to age, BMI and glycaemic levels, other  
44 maternal factors significantly contributed to the risk of receiving pharmacological treatment  
45 in our study. In previous literature, smoking was more common among insulin-treated  
46 women than women treated with lifestyle changes but no significant differences have been  
47 found [12,23,24]. Further, some studies found that pharmacologically treated women were  
48 more likely to be multiparous than women receiving lifestyle changes [9,11,12,23], however  
49 others did not demonstrate significant differences in parity [24]. There is no consensus  
50  
51  
52  
53  
54  
55  
56  
57  
58  
59  
60

1  
2  
3 regarding ethnicity as different ethnic groups have been shown to be most at risk of insulin  
4 treatment: Middle Eastern/North African [23], Middle Eastern [9] and Anglo-European [10].  
5  
6 More research is required to gain a greater understanding of the relationships between socio-  
7  
8 demographic and lifestyle factors and GDM pharmacological treatment. This could  
9  
10 supplement the approach to GDM management beyond the standard clinical risk factors.  
11  
12  
13  
14  
15  
16  
17

18 The addition of metformin to the set of pharmacological options was not associated, at the  
19 time of the study, with any substantial shift in GDM management as insulin remained the  
20 most common prescribed treatment. Nevertheless, we have found that, after metformin  
21 introduction, metformin-treated women had the highest BMI which is in line with a study by  
22 McGrath *et al.* [28]. However, Ijas *et al.* [29] compared metformin only to metformin plus  
23 insulin groups and demonstrated that metformin was more likely to be effective for women  
24 with lower BMI. In our study however, the decrease in the proportion of insulin treatment for  
25 overweight and obese women after metformin introduction suggests that metformin may have  
26 been used as an alternative to insulin for mothers with the highest BMI. Further, we found  
27 that women with more severe hyperglycaemia were consistently prescribed insulin rather  
28 than metformin, which corroborated previous research [28–30]. As metformin is believed to  
29 act less rapidly than insulin [15], it may be that in our study, even after metformin  
30 introduction, the most hyperglycaemic women were preferentially prescribed insulin to  
31 promptly restore normoglycaemia. Finally, the differences in maternal characteristics  
32 between pharmacological treatment types may also be explained by additional non-clinical  
33 factors that could have varying degrees of impact on the decision to treat GDM with insulin  
34 or metformin. These include the cost implications of treatment (metformin tends to be less  
35 expensive than insulin) [31], maternal treatment preference (e.g. preference for metformin as  
36 insulin injections are invasive) and cultural barriers to compliance [27].  
37  
38  
39  
40  
41  
42  
43  
44  
45  
46  
47  
48  
49  
50  
51  
52  
53  
54  
55  
56  
57  
58  
59  
60

1  
2  
3  
4  
5  
6 The main strength of this study is that our findings are based on a large sample of women  
7 diagnosed with GDM from a cohort where universal GDM screening was in place. Further,  
8 all data originated from a single diabetes clinic in the UK managed by the same clinician and  
9 where the same diagnostic criteria and glucose targets for GDM management were used  
10 throughout the study. Although this may limit the generalisability of our results, this also  
11 minimised bias related to differences in clinical practice and decisions between clinics. We  
12 could not however control for clinicians' preference for a specific treatment or patient  
13 compliance to treatment. Another strength of our study is that, unlike previous studies that  
14 explored maternal characteristics of GDM treatment either before or after metformin  
15 introduction, our data captured GDM management both pre- and post-metformin  
16 introduction. This allowed for an analysis of the changes in GDM pharmacological  
17 management when metformin was first introduced, which, to the best of our knowledge, has  
18 never been conducted before. We are however limited by the relatively small sample of  
19 women treated with metformin at the time of the BiB study. We expect that our study could  
20 be reproduced using data from an updated BiB cohort, to examine the differences in  
21 characteristics between insulin- and metformin-treated mothers now that metformin has been  
22 used for more than a decade.

23  
24  
25  
26  
27  
28  
29  
30  
31  
32  
33  
34  
35  
36  
37  
38  
39  
40  
41  
42  
43  
44  
45  
46  
47  
48  
49 To conclude, in the UK BiB cohort, consistently with previous research, women with GDM  
50 who were older, more hyperglycaemic and had higher BMI were more likely to require  
51 pharmacological treatment. When metformin was first introduced as GDM treatment, it led to  
52 changes in GDM management according to maternal weight status but not glycaemic status.  
53  
54  
55  
56  
57  
58  
59  
60

1  
2  
3 Further research in the UK is needed to determine to which extent the maternal determinants  
4  
5 of GDM pharmacological treatment impact on obstetric and neonatal outcomes.  
6  
7  
8  
9  
10  
11  
12  
13  
14  
15  
16  
17  
18  
19  
20  
21  
22  
23  
24  
25  
26  
27  
28  
29  
30  
31  
32  
33  
34  
35  
36  
37  
38  
39  
40  
41  
42  
43  
44  
45  
46  
47  
48  
49  
50  
51  
52  
53  
54  
55  
56  
57  
58  
59  
60

For peer review only

## Acknowledgements

Born in Bradford is only possible because of the enthusiasm and commitment of the children and parents in BiB. We are grateful to all the participants, health professionals, schools and researchers who have made Born in Bradford happen.

## Declarations

## Funding

This research was funded by Loughborough University and supported by the National Institute for Health Research (NIHR) Leicester Biomedical Research Centre. E.S.P. and W.J. acknowledge support from the National Institute for Health Research (NIHR) Leicester Biomedical Research Centre, which is a partnership between University Hospitals of Leicester NHS Trust, Loughborough University, and the University of Leicester. W.J. is supported by a UK Medical Research Council (MRC) New Investigator Research Grant (MR/P023347/1). Born in Bradford received funding from a Wellcome Trust infrastructure grant (WT101597MA), the National Institute for Health Research under its Collaboration for Applied Health Research and Care (CLAHRC) (IS-CLA-0113-10020). The NIHR Clinical Research Network which provided research delivery support for this study.

The views expressed in this paper are those of the authors and not necessarily those of the NIHR.

## Authors' contribution

G.M-E. wrote the manuscript and was responsible for the acquisition, analysis, and interpretation of data. E.S.P. and W.J. revised the manuscript and contributed to the

1  
2  
3 acquisition, analysis, and interpretation of data. E.H. contributed to the analysis and  
4  
5 interpretation of data and reviewed the manuscript. M.H. reviewed the manuscript. G.M-E.,  
6  
7 W.J. and E.S.P. are guarantors of this work and, as such, had full access to all the data in the  
8  
9 study and take responsibility for the integrity of the data and the accuracy of the data  
10  
11 analysis.  
12  
13  
14  
15  
16  
17

### 18 **Declarations of interest**

19  
20  
21 None  
22  
23  
24  
25  
26

### 27 **Data availability**

28  
29  
30 Scientists are encouraged and able to use BiB data. Data requests are made to the BiB  
31  
32 executive using the form available from the study website <http://www.borninbradford.nhs.uk>.  
33  
34 Guidance for researchers and collaborators, the study protocol and the data collection  
35  
36 schedule are all available via the website. All requests are carefully considered and accepted  
37  
38 where possible.  
39  
40  
41  
42  
43  
44

### 45 **Ethics approval**

46  
47  
48 Ethical approval for the study was granted by Bradford Research Ethics Committee (Ref  
49  
50 07/H1302/112).  
51  
52  
53  
54  
55

### 56 **Informed consent**

57  
58  
59 All participants provided written consent for the BiB study.  
60

## References

- 1 American Diabetes Association. Diagnosis and Classification of Diabetes Mellitus. *Diabetes Care* 2008;**31**:S55–60. doi:10.2337/dc08-S055
- 2 International Diabetes Federation. *IDF Diabetes Atlas 2019*. 2019. <http://www.idf.org/about-diabetes/facts-figures>
- 3 Diabetes UK. Us, diabetes and a lot of facts and stats. London: 2019. [www.diabetes.org.uk](http://www.diabetes.org.uk)
- 4 Chen L, Mayo R, Chatry A, *et al*. Gestational Diabetes Mellitus: Its Epidemiology and Implication beyond Pregnancy. *Curr Epidemiol Reports* 2016;**3**:1–11. doi:10.1007/s40471-016-0063-y
- 5 American Diabetes Association. Management of diabetes in pregnancy: Standards of medical care in diabetes. *Diabetes Care* 2019;**42**:S165–72. doi:10.2337/dc19-S014
- 6 National Institute for Health and Care. Diabetes in pregnancy : management from preconception to the postnatal period. 2015.
- 7 Rowan JA, Hague WM, Gao W, *et al*. Metformin versus Insulin for the Treatment of Gestational Diabetes. *N Engl J Med* 2008;**358**:2003–15. doi:10.1056/NEJMoa0707193
- 8 Lindsay RS, Loeken MR. Metformin use in pregnancy: promises and uncertainties. *Diabetologia* 2017;**60**:1612–9. doi:10.1007/s00125-017-4351-y
- 9 Barnes RA, Wong T, Ross GP, *et al*. A novel validated model for the prediction of insulin therapy initiation and adverse perinatal outcomes in women with gestational diabetes mellitus. *Diabetologia* 2016;**59**:2331–8. doi:10.1007/s00125-016-4047-8
- 10 Wong VW, Jalaludin B. Gestational diabetes mellitus: Who requires insulin therapy? *Aust New Zeal J Obstet Gynaecol* 2011;**51**:432–6. doi:10.1111/j.1479-828X.2011.01329.x
- 11 Aktun LH, Yorgunlar B, Karaca N, *et al*. Predictive Risk Factors in the Treatment of Gestational Diabetes Mellitus. *Clin Med Insights Women's Heal* 2015;**8**:CMWH.S31564. doi:10.4137/cmwh.s31564
- 12 González-Quintero VH, Istwan NB, Rhea DJ, *et al*. Antenatal Factors Predicting Subsequent Need for Insulin Treatment in Women with Gestational Diabetes. *J Women's Heal* 2008;**17**:1183–7. doi:10.1089/jwh.2007.0667
- 13 Zhang Y, Shao J, Li F, *et al*. Factors in Gestational Diabetes Mellitus Predicting the Needs for Insulin Therapy. *Int J Endocrinol* 2016;**2016**:1–5. doi:10.1155/2016/4858976
- 14 Ali A, Shastry S, Nithiyanthan R, *et al*. Gestational diabetes–Predictors of response to treatment and obstetric outcome. *Eur J Obstet Gynecol Reprod Biol* 2018;**220**:57–60. doi:10.1016/j.ejogrb.2017.11.014
- 15 Khin MO, Gates S, Saravanan P. Predictors of metformin failure in gestational diabetes mellitus (GDM). *Diabetes Metab Syndr Clin Res Rev* 2018;**12**:405–10. doi:10.1016/j.dsx.2018.01.003

- 1  
2  
3 16 Gandhi P, Bustani R, Madhuvrata P, *et al.* Introduction of metformin for gestational  
4 diabetes mellitus in clinical practice: Has it had an impact? *Eur J Obstet Gynecol*  
5 *Reprod Biol* 2012;**160**:147–50. doi:10.1016/j.ejogrb.2011.11.018  
6  
7 17 Raynor P, Duley L, Small N, *et al.* Born in Bradford, a cohort study of babies born in  
8 Bradford, and their parents: Protocol for the recruitment phase. *BMC Public Health*  
9 2008;**8**:1–13. doi:10.1186/1471-2458-8-327  
10  
11 18 Wright J, Small N, Raynor P, *et al.* Cohort profile: The born in Bradford multi-ethnic  
12 family cohort study. *Int J Epidemiol* 2013;**42**:978–91. doi:10.1093/ije/dys112  
13  
14 19 World Health Organisation. Definition, diagnosis and classification of diabetes  
15 mellitus and its complications. Report of a WHO consultation. Part 1: diagnosis and  
16 classification of diabetes mellitus. <https://apps.who.int/iris/handle/10665/66040>  
17  
18 20 Office for National Statistics. Ethnic group statistics: a guide for the collection and  
19 classification of ethnicity data - Office for National Statistics. Off. Natl. Stat.  
20 2003. <https://www.ons.gov.uk/methodology/classificationsandstandards/measuringequality/ethnicgroupnationalidentityandreligion>  
21  
22 21 National Health Service . The General Practice Physical Activity Questionnaire  
23 (GPPAQ): A screening tool to assess adult physical activity levels, within primary  
24 care. 2009. doi:10.1007/s00330-011-2164-9  
25  
26 22 Vincent M, Hansen NR. Sparse group lasso and high dimensional multinomial  
27 classification. *Comput Stat Data Anal* 2014;**71**:771–86.  
28 doi:10.1016/j.csda.2013.06.004  
29  
30 23 Koning SH, Scheuneman KA, Lutgers HL, *et al.* Risk stratification for healthcare  
31 planning in women with gestational diabetes mellitus. *Neth J Med* 2016;**74**:262–9.  
32  
33 24 Sapienza AD, Francisco RPV, Trindade TC, *et al.* Factors predicting the need for  
34 insulin therapy in patients with gestational diabetes mellitus. *Diabetes Res Clin Pract*  
35 2010;**88**:81–6. doi:10.1016/j.diabres.2009.12.023  
36  
37 25 Nishikawa T, Ono K, Hashimoto S, *et al.* One-hour oral glucose tolerance test plasma  
38 glucose at gestational diabetes diagnosis is a common predictor of the need for insulin  
39 therapy in pregnancy and postpartum impaired glucose tolerance. *J Diabetes Investig*  
40 2018;**9**:1370–7. doi:10.1111/jdi.12848  
41  
42 26 West J, Lawlor DA, Fairley L, *et al.* Differences in socioeconomic position, lifestyle  
43 and health-related pregnancy characteristics between Pakistani and White British  
44 women in the Born in Bradford prospective cohort study: The influence of the  
45 woman's, her partner's and their parents' place . *BMJ Open* 2014;**4**.  
46 doi:10.1136/bmjopen-2014-004805  
47  
48 27 Draffin CR, Alderdice FA, McCance DR, *et al.* Exploring the needs, concerns and  
49 knowledge of women diagnosed with gestational diabetes: A qualitative study.  
50 *Midwifery* 2016;**40**:141–7. doi:10.1016/j.midw.2016.06.019  
51  
52 28 McGrath R, Glastras S, Scott E, *et al.* Outcomes for Women with Gestational Diabetes  
53 Treated with Metformin: A Retrospective, Case-Control Study. *J Clin Med* 2018;**7**:50.  
54 doi:10.3390/jcm7030050  
55  
56 29 Ijas H, Vaarasmaki M, Morin-Papunen L, *et al.* Metformin should be considered in the  
57 treatment of gestational diabetes: A prospective randomised study. *BJOG An Int J*  
58  
59  
60



- 1  
2  
3 *Obstet Gynaecol* 2010;**118**:880–5. doi:10.1111/j.1471-0528.2010.02763.x  
4  
5 30 Goh JEL, Sadler L, Rowan J. Metformin for gestational diabetes in routine clinical  
6 practice. *Diabet Med* 2011;**28**:1082–7. doi:10.1111/j.1464-5491.2011.03361.x  
7  
8 31 Ainuddin J, Karim N, Hasan AA, *et al.* Metformin versus insulin treatment in  
9 gestational diabetes in pregnancy in a developing country. A randomized control trial.  
10 *Diabetes Res Clin Pract* 2015;**107**:290–9. doi:10.1016/j.diabres.2014.10.001  
11  
12  
13  
14  
15  
16  
17  
18  
19  
20  
21  
22  
23  
24  
25  
26  
27  
28  
29  
30  
31  
32  
33  
34  
35  
36  
37  
38  
39  
40  
41  
42  
43  
44  
45  
46  
47  
48  
49  
50  
51  
52  
53  
54  
55  
56  
57  
58  
59  
60

For peer review only

1  
2  
3  
4  
5  
6  
7  
8  
9  
10  
11  
12  
13  
14  
15  
16  
17  
18  
19  
20  
21  
22  
23  
24  
25  
26  
27  
28  
29  
30  
31  
32  
33  
34  
35  
36  
37  
38  
39  
40  
41  
42  
43  
44  
45  
46  
47  
48  
49  
50  
51  
52  
53  
54  
55  
56  
57  
58  
59  
60**Table 1** Maternal characteristics by GDM treatment type across the whole study period (2007-2011)

|                                                                               |              | <b>Lifestyle changes (n=244)</b> | <b>Pharmacological treatment (n=518)</b> | <b>P</b> | <b>P*</b> | <b>n (%) Missing</b> |
|-------------------------------------------------------------------------------|--------------|----------------------------------|------------------------------------------|----------|-----------|----------------------|
| <b>Start date of treatment<sup>‡</sup></b>                                    | n (%)        |                                  |                                          | 0.486    | 1.000     | 4 (0.5)              |
| 10 Before metformin introduction (2007-09)                                    |              | 121 (49.6)                       | 241 (47)                                 |          |           |                      |
| 11 After metformin introduction (2009-11)                                     |              | 123 (50.4)                       | 273 (53)                                 |          |           |                      |
| <b>Age at childbirth<sup>†</sup> (years)</b>                                  | Median (IQR) | 29.9 (8.1)                       | 31.7 (7.6)                               | <0.001   | 0.001     | 0                    |
| <b>BMI at booking<sup>†</sup> (kg/m<sup>2</sup>)</b>                          | Median (IQR) | 25.2 (6.0)                       | 28.4 (7.9)                               | <0.001   | <0.001    | 46 (6.0)             |
| <b>BMI category at booking<sup>‡</sup></b>                                    | n (%)        |                                  |                                          | <0.001   | <0.001    | 46 (6.0)             |
| 17 Underweight ( <i>BMI</i> < 18.5 kg/m <sup>2</sup> )                        |              | 7 (3.0)                          | 7 (1.4)                                  |          |           |                      |
| 18 Normal weight ( <i>18.5</i> ≤ <i>BMI</i> ≤ <i>24.9</i> kg/m <sup>2</sup> ) |              | 107 (46.1)                       | 122 (25.2)                               |          |           |                      |
| 19 Overweight ( <i>25.0</i> ≤ <i>BMI</i> ≤ <i>29.9</i> kg/m <sup>2</sup> )    |              | 74 (31.9)                        | 153 (31.6)                               |          |           |                      |
| 20 Obese ( <i>BMI</i> ≥ <i>30.0</i> kg/m <sup>2</sup> )                       |              | 44 (19.0)                        | 202 (41.7)                               |          |           |                      |
| <b>Smoking during pregnancy<sup>‡</sup></b>                                   | n (%)        |                                  |                                          | 0.008    | 0.096     | 1 (0.1)              |
| 22 Yes                                                                        |              | 11 (4.5)                         | 53 (10.2)                                |          |           |                      |
| 23 No                                                                         |              | 233 (95.5)                       | 464 (89.8)                               |          |           |                      |
| <b>Parity<sup>‡</sup></b>                                                     | n (%)        |                                  |                                          | 0.671    | 1.000     | 24 (3.1)             |
| 26 0                                                                          |              | 88 (37.0)                        | 164 (32.8)                               |          |           |                      |
| 27 1                                                                          |              | 53 (22.3)                        | 119 (23.8)                               |          |           |                      |
| 28 2                                                                          |              | 41 (17.2)                        | 99 (19.8)                                |          |           |                      |
| 29 3+                                                                         |              | 56 (23.5)                        | 118 (23.6)                               |          |           |                      |
| <b>Physical activity levels<sup>‡</sup></b>                                   | n (%)        |                                  |                                          | 0.684    | 1.000     | 109 (14)             |
| 31 Inactive                                                                   |              | 134 (62.3)                       | 285 (65.1)                               |          |           |                      |
| 32 Moderately inactive                                                        |              | 37 (17.2)                        | 77 (17.6)                                |          |           |                      |
| 33 Moderately active                                                          |              | 35 (16.3)                        | 56 (12.8)                                |          |           |                      |
| 34 Active                                                                     |              | 9 (4.2)                          | 20 (4.6)                                 |          |           |                      |
| <b>Ethnic group<sup>‡</sup></b>                                               | n (%)        |                                  |                                          | 0.060    | 0.540     | 0                    |
| 36 White British                                                              |              | 47 (19.3)                        | 140 (27.0)                               |          |           |                      |
| 37 Pakistani                                                                  |              | 152 (62.3)                       | 298 (57.5)                               |          |           |                      |
| 38 Other                                                                      |              | 45 (18.4)                        | 80 (15.4)                                |          |           |                      |
| <b>Migration status<sup>‡</sup></b>                                           | n (%)        |                                  |                                          | 0.253    | 1.000     | 13 (1.7)             |
| 40 Born in the UK or moved ≤ 5 years                                          |              | 121 (51.3)                       | 286 (55.7)                               |          |           |                      |
| 41 Moved to the UK > 5 years                                                  |              | 115 (48.7)                       | 227 (44.2)                               |          |           |                      |
| <b>Marital and cohabitation status<sup>‡</sup></b>                            | n (%)        |                                  |                                          | 0.239    | 1.000     | 0                    |
| 44 Married and living with partner                                            |              | 198 (81.1)                       | 411 (79.3)                               |          |           |                      |
| 45 Not married and living with partner                                        |              | 21 (8.6)                         | 64 (12.4)                                |          |           |                      |
| 46 Not living with partner                                                    |              | 25 (10.2)                        | 43 (8.3)                                 |          |           |                      |
| <b>Highest educational qualification<sup>‡</sup></b>                          | n (%)        |                                  |                                          | 0.528    | 1.000     | 4 (0.5)              |
| 48 GCSE equivalent or less                                                    |              | 124 (51.0)                       | 273 (53.0)                               |          |           |                      |
| 49 A-level equivalent                                                         |              | 28 (11.5)                        | 57 (11.1)                                |          |           |                      |
| 50 Higher than A-level                                                        |              | 76 (31.3)                        | 141 (27.4)                               |          |           |                      |
| 51 Other/Unknown                                                              |              | 15 (6.2)                         | 44 (8.5)                                 |          |           |                      |
| <b>Family history of diabetes<sup>‡</sup></b>                                 | n (%)        |                                  |                                          | 0.010    | 0.100     | 63 (8.3)             |
| 54 Yes                                                                        |              | 128 (57.7)                       | 323 (67.7)                               |          |           |                      |
| 55 No                                                                         |              | 94 (42.3)                        | 154 (32.3)                               |          |           |                      |
| <b>Pre-existing hypertension<sup>§</sup></b>                                  | n (%)        |                                  |                                          | 0.563    | 1.000     | 53 (7.0)             |
| 57 Yes                                                                        |              | 3 (1.3)                          | 10 (2.1)                                 |          |           |                      |
| 58 No                                                                         |              | 228 (98.7)                       | 468 (97.9)                               |          |           |                      |
| <b>History of GDM before the study<sup>‡</sup></b>                            | n (%)        |                                  |                                          | 0.075    | 0.600     | 93 (12)              |

|    |                                                                         |              |            |            |        |          |
|----|-------------------------------------------------------------------------|--------------|------------|------------|--------|----------|
| 1  |                                                                         |              |            |            |        |          |
| 2  |                                                                         |              |            |            |        |          |
| 3  | Yes                                                                     |              | 10 (4.6)   | 38 (8.4)   |        |          |
| 4  | No                                                                      |              | 207 (95.4) | 414 (91.6) |        |          |
| 5  |                                                                         |              |            |            |        |          |
| 6  | <b>Mother's employment status<sup>‡</sup></b>                           | n (%)        |            |            | 0.008  | 0.096    |
| 7  | Currently employed                                                      |              | 90 (36.9)  | 203 (39.2) |        | 0        |
| 8  | Previously employed                                                     |              | 55 (22.5)  | 159 (30.7) |        |          |
| 9  | Never employed                                                          |              | 99 (40.6)  | 156 (30.1) |        |          |
| 10 | <b>Gestational age at OGTT<sup>†</sup> (weeks)</b>                      | Median (IQR) | 26.4 (1.6) | 26.3 (0.8) | 0.006  | 0.078    |
| 11 |                                                                         |              |            |            |        | 13 (1.7) |
| 12 | <b>Fasting glucose concentrations at OGTT<sup>†</sup> (mmol/L)</b>      | Median (IQR) | 4.7 (0.7)  | 5.1 (1.1)  | <0.001 | <0.001   |
| 13 |                                                                         |              |            |            |        | 13 (1.7) |
| 14 | <b>2h post-load glucose concentrations at OGTT<sup>†</sup> (mmol/L)</b> | Median (IQR) | 8.2 (0.8)  | 8.6 (1.6)  | <0.001 | <0.001   |
| 15 |                                                                         |              |            |            |        | 13 (1.7) |

16 A-level: UK highest qualification in high school; BMI: body mass index; GCSE: general certificate of secondary education; OGTT: oral glucose tolerance test

17 Continuous data presented as median and interquartile range (IQR).

18 Categorical data presented as frequencies and percentages.

19 \*Adjusted *P*-value after Holm-Bonferroni correction

20 †Mann-Whitney U test

21 ‡Chi-square test

22 §Fisher's exact test

23

24

25

26

27

28

29

30

31

32

33

34

35

36

37

38

39

40

41

42

43

44

45

46

47

48

49

50

51

52

53

54

55

56

57

58

59

60

1  
2  
3**Table 2** Maternal characteristics by GDM treatment type after metformin introduction (2009-2011)

|                                                                            |              | <b>Lifestyle changes (n=123)</b> | <b>Insulin (n=200)</b> | <b>Metformin (n=73)</b> | <b>P</b> | <b>P*</b> | <b>n (%) Missing</b> |
|----------------------------------------------------------------------------|--------------|----------------------------------|------------------------|-------------------------|----------|-----------|----------------------|
| <b>Age at childbirth<sup>†</sup> (years)</b>                               | Median (IQR) | 29.1 (7.8)                       | 31.8 (8.2)             | 30.6 (9.0)              | <0.001   | 0.004     | 0                    |
| <b>BMI at booking<sup>†</sup> (kg/m<sup>2</sup>)</b>                       | Median (IQR) | 24.7 (4.9)                       | 28.1 (9.2)             | 29.3 (6.5)              | <0.001   | 0.001     | 21 (2.8)             |
| <b>BMI category at booking<sup>§</sup></b>                                 | n (%)        |                                  |                        |                         | <0.001   | <0.001    | 21 (2.8)             |
| Underweight ( <i>BMI</i> < 18.5 kg/m <sup>2</sup> )                        |              | 4 (3.4)                          | 5 (2.7)                | 0                       |          |           |                      |
| Normal weight ( <i>18.5</i> ≤ <i>BMI</i> ≤ <i>24.9</i> kg/m <sup>2</sup> ) |              | 57 (48.3)                        | 55 (29.3)              | 16 (23.2)               |          |           |                      |
| Overweight ( <i>25.0</i> ≤ <i>BMI</i> ≤ <i>29.9</i> kg/m <sup>2</sup> )    |              | 40 (33.9)                        | 51 (27.1)              | 22 (31.9)               |          |           |                      |
| Obese ( <i>BMI</i> ≥ <i>30.0</i> kg/m <sup>2</sup> )                       |              | 17 (14.4)                        | 77 (41.0)              | 31 (44.9)               |          |           |                      |
| <b>Smoking during pregnancy<sup>‡</sup></b>                                | n (%)        |                                  |                        |                         | 0.004    | 0.032     | 0                    |
| Yes                                                                        |              | 4 (3.3)                          | 29 (14.5)              | 6 (8.2)                 |          |           |                      |
| No                                                                         |              | 119 (96.7)                       | 171 (85.5)             | 67 (91.8)               |          |           |                      |
| <b>Parity<sup>‡</sup></b>                                                  | n (%)        |                                  |                        |                         | 0.145    | 0.580     | 6 (0.8)              |
| 0                                                                          |              | 52 (43.0)                        | 68 (34.5)              | 22 (30.6)               |          |           |                      |
| 1                                                                          |              | 26 (21.5)                        | 46 (23.3)              | 21 (29.2)               |          |           |                      |
| 2                                                                          |              | 18 (14.9)                        | 35 (17.8)              | 19 (26.4)               |          |           |                      |
| 3                                                                          |              | 25 (20.7)                        | 48 (24.4)              | 10 (13.9)               |          |           |                      |
| 4+                                                                         |              |                                  |                        |                         |          |           |                      |
| <b>Physical activity levels<sup>‡</sup></b>                                | n (%)        |                                  |                        |                         | 0.424    | 0.630     | 1 (0.1)              |
| Inactive                                                                   |              | 71 (57.7)                        | 116 (58.3)             | 43 (58.9)               |          |           |                      |
| Moderately inactive                                                        |              | 23 (18.7)                        | 43 (21.6)              | 9 (12.3)                |          |           |                      |
| Moderately active                                                          |              | 22 (17.9)                        | 30 (15.1)              | 13 (17.8)               |          |           |                      |
| Active                                                                     |              | 7 (5.7)                          | 10 (5.0)               | 8 (11.0)                |          |           |                      |
| <b>Ethnic group<sup>‡</sup></b>                                            | n (%)        |                                  |                        |                         | 0.210    | 0.630     | 0                    |
| White British                                                              |              | 24 (19.5)                        | 54 (27.0)              | 15 (20.5)               |          |           |                      |
| Pakistani                                                                  |              | 74 (60.2)                        | 113 (56.5)             | 50 (68.5)               |          |           |                      |
| Other                                                                      |              | 25 (20.3)                        | 33 (16.5)              | 8 (11.0)                |          |           |                      |
| <b>Highest educational qualification<sup>‡</sup></b>                       | n (%)        |                                  |                        |                         | 0.297    | 0.630     | 0                    |
| GCSE equivalent or less                                                    |              | 53 (43.1)                        | 104 (52.0)             | 32 (43.8)               |          |           |                      |
| A-level equivalent                                                         |              | 17 (13.8)                        | 27 (13.5)              | 7 (9.6)                 |          |           |                      |
| Higher than A-level                                                        |              | 44 (35.8)                        | 55 (27.5)              | 31 (42.5)               |          |           |                      |
| Other/Unknown                                                              |              | 9 (7.3)                          | 14 (7.0)               | 3 (4.1)                 |          |           |                      |
| <b>Family history of diabetes<sup>‡</sup></b>                              | n (%)        |                                  |                        |                         | 0.099    | 0.553     | 27 (3.5)             |
| Yes                                                                        |              | 65 (57.0)                        | 130 (69.1)             | 42 (62.7)               |          |           |                      |
| No                                                                         |              | 49 (43.0)                        | 58 (30.8)              | 25 (37.3)               |          |           |                      |
| <b>Mother's employment status<sup>‡</sup></b>                              | n (%)        |                                  |                        |                         | 0.079    | 0.553     | 0                    |
| Currently employed                                                         |              | 48 (39.0)                        | 80 (40.0)              | 28 (38.4)               |          |           |                      |
| Previously employed                                                        |              | 19 (15.4)                        | 54 (27.0)              | 20 (27.4)               |          |           |                      |
| Never employed                                                             |              | 56 (45.5)                        | 66 (33.0)              | 25 (34.2)               |          |           |                      |
| <b>Gestational age at OGTT<sup>†</sup> (weeks)</b>                         | Median (IQR) | 26.3 (1.8)                       | 26.1 (0.8)             | 26.3 (0.7)              | 0.087    | 0.553     | 8 (1.0)              |
| <b>Fasting glucose concentrations at OGTT<sup>†</sup> (mmol/L)</b>         | Median (IQR) | 4.7 (0.8)                        | 5.2 (1.2)              | 4.8 (0.7)               | <0.001   | 0.001     | 8 (1.0)              |
| <b>2h post-load glucose concentrations at OGTT<sup>†</sup> (mmol/L)</b>    | Median (IQR) | 8.2 (0.8)                        | 8.6 (1.6)              | 8.4 (1.3)               | <0.001   | 0.001     | 8 (1.0)              |

A-level: UK highest qualification in high school; BMI: body mass index; GCSE: general certificate of secondary education; OGTT: oral glucose tolerance test

Continuous data presented as median and interquartile range (IQR).

Categorical data presented as frequencies and percentages.

\*Adjusted *P*-values after Holm-Bonferroni correction

<sup>†</sup>Kruskal-Wallis test

For peer review only - <http://bmjopen.bmj.com/site/about/guidelines.xhtml>

<sup>‡</sup>Chi-square test

<sup>§</sup>Fisher's exact test

1  
2  
3  
4  
5  
6  
7  
8  
9  
10  
11  
12  
13  
14  
15  
16  
17  
18  
19  
20  
21  
22  
23  
24  
25  
26  
27  
28  
29  
30  
31  
32  
33  
34  
35  
36  
37  
38  
39  
40  
41  
42  
43  
44  
45  
46  
47  
48  
49  
50  
51  
52  
53  
54  
55  
56  
57  
58  
59  
60

Figure 1 legend: Flowchart of study participation

For peer review only

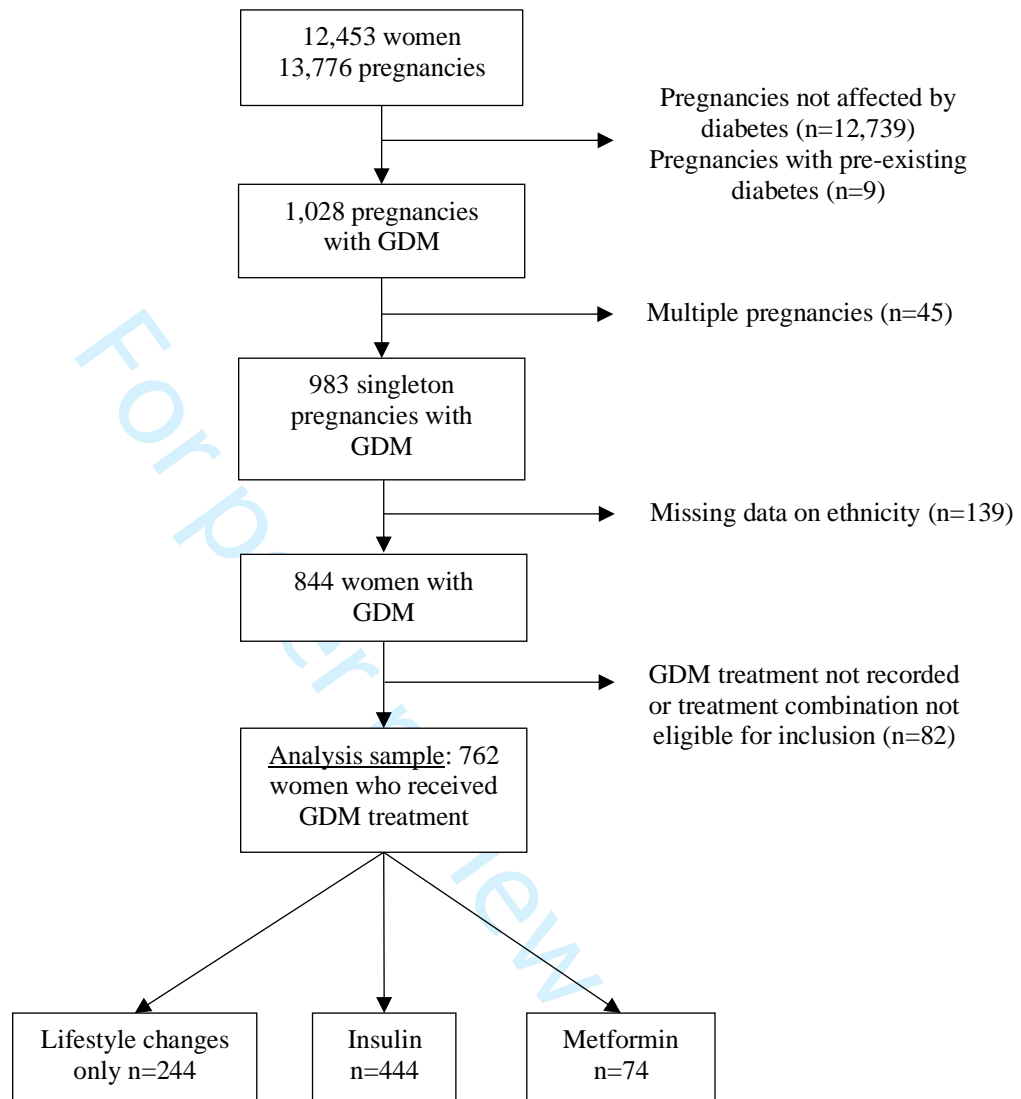

**Figure 1** Flowchart of study participation

**Supplementary Table 1. Maternal characteristics selected by LASSO: Binary logistic regression estimating coefficients associated with GDM pharmacological treatment**

| Order of selection | Variable/Level of variable selected         | Coefficients |
|--------------------|---------------------------------------------|--------------|
| 1                  | BMI at booking (kg/m <sup>2</sup> )         | 0.09         |
| 2                  | Fasting glucose (mmol/L)                    | 0.4          |
| 3                  | Age at childbirth (years)                   | 0.3          |
| 4                  | BMI category: normal weight                 | -0.2         |
|                    | BMI category: obese                         | 0.2          |
| 5                  | 2-hour post-load glucose (mmol/L)           | 0.2          |
|                    | Gestational age at OGTT (weeks)             | -0.2         |
| 6                  | Ethnicity: White British                    | 0.2          |
| 7                  | Smoking during pregnancy                    | 0.1          |
| 8                  | Employment status: never employed           | -0.05        |
| 9                  | Parity: 3+ children                         | -0.1         |
| 10                 | Physical activity levels: active            | 0.03         |
|                    | Family history of diabetes                  | 0.04         |
| 11                 | Education levels: 5 GCSE equivalent         | 0.06         |
|                    | Physical activity levels: moderately active | -0.03        |
| 12                 | Ethnicity: Other                            | -0.02        |
| 13                 | Employment status: previously employed      | 0.004        |
| 14                 | Parity: nulliparous                         | 0.0003       |

BMI: body mass index; GCSE: general certificate of secondary education (UK standard minimum level of education); OGTT: oral glucose tolerance test

Supplementary Table 2. Maternal characteristics by treatment type before and after metformin

|                                                                            |              | Before metformin introduction (n=362) |                    | After metformin introduction (n=396) |                    |                     |
|----------------------------------------------------------------------------|--------------|---------------------------------------|--------------------|--------------------------------------|--------------------|---------------------|
|                                                                            |              | Lifestyle changes<br>(n=121)          | Insulin<br>(n=241) | Lifestyle changes<br>(n=123)         | Insulin<br>(n=200) | Metformin<br>(n=73) |
| <b>Age at childbirth (years)</b>                                           | Median (IQR) | 30.4 (8.0)                            | 31.8 (6.9)         | 29.1 (7.8)                           | 31.8 (8.2)         | 30.6 (9.0)          |
| <b>BMI at booking (kg/m<sup>2</sup>)</b>                                   | Median (IQR) | 25.8 (7.0)                            | 28.3 (7.3)         | 24.7 (4.9)                           | 28.1 (9.2)         | 29.3 (6.5)          |
| <b>BMI category at booking</b>                                             | n (%)        |                                       |                    |                                      |                    |                     |
| Underweight ( <i>BMI</i> < 18.5 kg/m <sup>2</sup> )                        |              | <5                                    | <5                 | <5                                   | <5                 | <5                  |
| Normal weight ( <i>18.5</i> ≤ <i>BMI</i> ≤ <i>24.9</i> kg/m <sup>2</sup> ) |              | 50 (50.0)                             | 50 (50.0)          | 57 (44.5)                            | 55 (43.0)          | 16 (12.5)           |
| Overweight ( <i>25</i> ≤ <i>BMI</i> ≤ <i>29.99</i> kg/m <sup>2</sup> )     |              | 34 (30.1)                             | 79 (69.9)          | 40 (35.4)                            | 51 (45.1)          | 22 (19.5)           |
| Obese ( <i>BMI</i> ≥ 30 kg/m <sup>2</sup> )                                |              | 27 (22.5)                             | 93 (77.5)          | 17 (13.6)                            | 77 (61.6)          | 31 (24.8)           |
| <b>Smoking during pregnancy</b>                                            | n (%)        |                                       |                    |                                      |                    |                     |
| Yes                                                                        |              | 7 (29.2)                              | 17 (70.8)          | <5                                   | 29 (74.4)          | 6 (15.4)            |
| No                                                                         |              | 114 (33.8)                            | 223 (66.2)         | 119 (33.3)                           | 171 (47.9)         | 67 (18.8)           |
| <b>Fasting glucose concentrations at OGTT (mmol/L)</b>                     | Median (IQR) | 4.7 (0.9)                             | 5.1 (1.3)          | 4.7 (0.8)                            | 5.2 (1.2)          | 4.8 (0.7)           |
| <b>2h post-load glucose concentrations at OGTT (mmol/L)</b>                | Median (IQR) | 8.2 (0.9)                             | 8.7 (1.6)          | 8.2 (0.8)                            | 8.6 (1.6)          | 8.4 (1.3)           |

Continuous data presented as median and interquartile range (IQR).

Categorical data presented as frequencies and percentages.

BMI: body mass index; OGTT: oral glucose tolerance test



1 STROBE Statement—Checklist of items that should be included in reports of *cohort studies*

|                              | Item No | Recommendation                                                                                                                                                                                    | Reported on page # |
|------------------------------|---------|---------------------------------------------------------------------------------------------------------------------------------------------------------------------------------------------------|--------------------|
| <b>Title and abstract</b>    | 1       | (a) Indicate the study's design with a commonly used term in the title or the abstract                                                                                                            | 1                  |
|                              |         | (b) Provide in the abstract an informative and balanced summary of what was done and what was found                                                                                               | 2                  |
| <b>Introduction</b>          |         |                                                                                                                                                                                                   |                    |
| Background/rationale         | 2       | Explain the scientific background and rationale for the investigation being reported                                                                                                              | 4-5                |
| Objectives                   | 3       | State specific objectives, including any prespecified hypotheses                                                                                                                                  | 5                  |
| <b>Methods</b>               |         |                                                                                                                                                                                                   |                    |
| Study design                 | 4       | Present key elements of study design early in the paper                                                                                                                                           | 5                  |
| Setting                      | 5       | Describe the setting, locations, and relevant dates, including periods of recruitment, exposure, follow-up, and data collection                                                                   | 5-6                |
| Participants                 | 6       | (a) Give the eligibility criteria, and the sources and methods of selection of participants. Describe methods of follow-up                                                                        | 6                  |
|                              |         | (b) For matched studies, give matching criteria and number of exposed and unexposed                                                                                                               | NA                 |
| Variables                    | 7       | Clearly define all outcomes, exposures, predictors, potential confounders, and effect modifiers. Give diagnostic criteria, if applicable                                                          | 7-8                |
| Data sources/<br>measurement | 8*      | For each variable of interest, give sources of data and details of methods of assessment (measurement). Describe comparability of assessment methods if there is more than one group              | 7-8                |
| Bias                         | 9       | Describe any efforts to address potential sources of bias                                                                                                                                         | 9                  |
| Study size                   | 10      | Explain how the study size was arrived at                                                                                                                                                         | 10                 |
| Quantitative variables       | 11      | Explain how quantitative variables were handled in the analyses. If applicable, describe which groupings were chosen and why                                                                      | 9-10               |
| Statistical methods          | 12      | (a) Describe all statistical methods, including those used to control for confounding                                                                                                             | 9-10               |
|                              |         | (b) Describe any methods used to examine subgroups and interactions                                                                                                                               | 9-10               |
|                              |         | (c) Explain how missing data were addressed                                                                                                                                                       | 9-10               |
|                              |         | (d) If applicable, explain how loss to follow-up was addressed                                                                                                                                    | NA                 |
|                              |         | (e) Describe any sensitivity analyses                                                                                                                                                             | NA                 |
| <b>Results</b>               |         |                                                                                                                                                                                                   |                    |
| Participants                 | 13*     | (a) Report numbers of individuals at each stage of study—eg numbers potentially eligible, examined for eligibility, confirmed eligible, included in the study, completing follow-up, and analysed | 10                 |
|                              |         | (b) Give reasons for non-participation at each stage                                                                                                                                              | 10                 |
|                              |         | (c) Consider use of a flow diagram                                                                                                                                                                | Fig. 1             |
| Descriptive data             | 14*     | (a) Give characteristics of study participants (eg demographic, clinical, social) and information on exposures and potential confounders                                                          | 10-11              |
|                              |         | (b) Indicate number of participants with missing data for each variable of interest                                                                                                               | Table 1, 2         |
|                              |         | (c) Summarise follow-up time (eg, average and total amount)                                                                                                                                       | NA                 |
| Outcome data                 | 15*     | Report numbers of outcome events or summary measures over time                                                                                                                                    | 10-11              |
| Main results                 | 16      | (a) Give unadjusted estimates and, if applicable, confounder-adjusted estimates and their precision (eg, 95% confidence interval). Make clear which                                               | 10-11              |

|                          |    |                                                                                                                                                                            |       |
|--------------------------|----|----------------------------------------------------------------------------------------------------------------------------------------------------------------------------|-------|
|                          |    | confounders were adjusted for and why they were included                                                                                                                   |       |
|                          |    | (b) Report category boundaries when continuous variables were categorized                                                                                                  | 10-11 |
|                          |    | (c) If relevant, consider translating estimates of relative risk into absolute risk for a meaningful time period                                                           | NA    |
| Other analyses           | 17 | Report other analyses done—eg analyses of subgroups and interactions, and sensitivity analyses                                                                             | 12    |
| <b>Discussion</b>        |    |                                                                                                                                                                            |       |
| Key results              | 18 | Summarise key results with reference to study objectives                                                                                                                   | 13    |
| Limitations              | 19 | Discuss limitations of the study, taking into account sources of potential bias or imprecision. Discuss both direction and magnitude of any potential bias                 | 15-16 |
| Interpretation           | 20 | Give a cautious overall interpretation of results considering objectives, limitations, multiplicity of analyses, results from similar studies, and other relevant evidence | 13-15 |
| Generalisability         | 21 | Discuss the generalisability (external validity) of the study results                                                                                                      | 16    |
| <b>Other information</b> |    |                                                                                                                                                                            |       |
| Funding                  | 22 | Give the source of funding and the role of the funders for the present study and, if applicable, for the original study on which the present article is based              | 5     |

\*Give information separately for exposed and unexposed groups.

**Note:** An Explanation and Elaboration article discusses each checklist item and gives methodological background and published examples of transparent reporting. The STROBE checklist is best used in conjunction with this article (freely available on the Web sites of PLoS Medicine at <http://www.plosmedicine.org/>, Annals of Internal Medicine at <http://www.annals.org/>, and Epidemiology at <http://www.epidem.com/>). Information on the STROBE Initiative is available at <http://www.strobe-statement.org>.

# BMJ Open

## Associations between maternal characteristics and pharmaceutical treatment of gestational diabetes: an analysis of the UK Born in Bradford (BiB) cohort study

|                                 |                                                                                                                                                                                                                                   |
|---------------------------------|-----------------------------------------------------------------------------------------------------------------------------------------------------------------------------------------------------------------------------------|
| Journal:                        | <i>BMJ Open</i>                                                                                                                                                                                                                   |
| Manuscript ID                   | bmjopen-2021-053753.R1                                                                                                                                                                                                            |
| Article Type:                   | Original research                                                                                                                                                                                                                 |
| Date Submitted by the Author:   | 20-Aug-2021                                                                                                                                                                                                                       |
| Complete List of Authors:       | Martine-Edith, Gilberte; Loughborough University, Johnson, William; Loughborough University<br>Hunsicker, Eugenie; Loughborough University<br>Hamer, Mark; University College London<br>Petherick, Emily; Loughborough University |
| <b>Primary Subject Heading</b>: | Epidemiology                                                                                                                                                                                                                      |
| Secondary Subject Heading:      | Diabetes and endocrinology, Public health                                                                                                                                                                                         |
| Keywords:                       | Diabetes in pregnancy < DIABETES & ENDOCRINOLOGY, EPIDEMIOLOGY, PUBLIC HEALTH                                                                                                                                                     |
|                                 |                                                                                                                                                                                                                                   |

SCHOLARONE™  
Manuscripts



I, the Submitting Author has the right to grant and does grant on behalf of all authors of the Work (as defined in the below author licence), an exclusive licence and/or a non-exclusive licence for contributions from authors who are: i) UK Crown employees; ii) where BMJ has agreed a CC-BY licence shall apply, and/or iii) in accordance with the terms applicable for US Federal Government officers or employees acting as part of their official duties; on a worldwide, perpetual, irrevocable, royalty-free basis to BMJ Publishing Group Ltd ("BMJ") its licensees and where the relevant Journal is co-owned by BMJ to the co-owners of the Journal, to publish the Work in this journal and any other BMJ products and to exploit all rights, as set out in our [licence](#).

The Submitting Author accepts and understands that any supply made under these terms is made by BMJ to the Submitting Author unless you are acting as an employee on behalf of your employer or a postgraduate student of an affiliated institution which is paying any applicable article publishing charge ("APC") for Open Access articles. Where the Submitting Author wishes to make the Work available on an Open Access basis (and intends to pay the relevant APC), the terms of reuse of such Open Access shall be governed by a Creative Commons licence – details of these licences and which [Creative Commons](#) licence will apply to this Work are set out in our licence referred to above.

Other than as permitted in any relevant BMJ Author's Self Archiving Policies, I confirm this Work has not been accepted for publication elsewhere, is not being considered for publication elsewhere and does not duplicate material already published. I confirm all authors consent to publication of this Work and authorise the granting of this licence.

1  
2  
3 **Associations between maternal characteristics and pharmaceutical treatment of**  
4 **gestational diabetes: an analysis of the UK Born in Bradford (BiB) cohort study**  
5  
6  
7  
8  
9

10  
11 Gilberte Martine-Edith<sup>1</sup>, William Johnson<sup>1</sup>, Eugenie Hunsicker<sup>2</sup>, Mark Hamer<sup>3</sup>, and Emily S  
12  
13 Petherick<sup>1</sup>  
14  
15

16  
17  
18  
19  
20 <sup>1</sup>School of Sport, Exercise and Health Sciences, Loughborough University, Loughborough,  
21  
22 UK  
23

24  
25 <sup>2</sup>School of Science, Loughborough University, Loughborough, UK  
26

27  
28 <sup>3</sup>Institute of Sport, Exercise and Health, Division Surgery Interventional Science, University  
29  
30 College London, London, UK  
31  
32

33  
34  
35  
36  
37  
38  
39  
40  
41  
42  
43  
44  
45  
46  
47  
48  
49  
50  
51  
52  
53  
54 Corresponding author: William Johnson, School of Sport, Exercise and Health Sciences,  
55  
56 Loughborough University, Epinal Way, LE11 3TU, Loughborough, UK. E-mail:  
57

58 [w.o.johnson@lboro.ac.uk](mailto:w.o.johnson@lboro.ac.uk)  
59  
60

## Abstract

**Objectives** To identify the maternal characteristics associated with pharmaceutical treatment of gestational diabetes mellitus (GDM)

**Design** Prospective birth cohort study

**Setting** Bradford, UK

**Participants** 762 women from the Born in Bradford (BiB) cohort who were treated for GDM in a singleton pregnancy. BiB cohort participants were recruited from 2007 until 2010. All women booked for delivery were screened for GDM between 26 and 28 weeks of gestation using a 75g 2-hour oral glucose tolerance test (OGTT).

**Outcome measure** GDM treatment type: lifestyle changes advice (lifestyle changes), lifestyle changes advice with supplementary insulin (insulin) and lifestyle changes advice with supplementary metformin (metformin)

**Results** 32% of women were prescribed lifestyle changes advice alone while 68% were offered supplemental pharmaceutical treatment. The odds of receiving pharmaceutical treatment relative to lifestyle changes advice alone were increased for mothers who were obese (OR 4.6 (95% CI 2.8, 7.5)), those who smoked (2.6 (1.2, 5.5)) and had higher fasting glucose levels at OGTT (2.1 (1.6, 2.7)). The odds of being prescribed pharmaceutical treatment rather than lifestyle changes advice were lower for Pakistani women (OR 0.7 (95% CI 0.4, 1.0)) than White British women. Relative to insulin treatment, metformin was more likely to be offered to obese women than normal weight women (RRR 3.2 (1.3, 7.8) and less likely to be prescribed to women with higher fasting glucose concentrations at OGTT (RRR (0.3 (0.2, 0.6))).

1  
2  
3 **Conclusions** In the BiB cohort, GDM pharmaceutical treatment tended to be prescribed to  
4 women who were obese, White British, who smoked and had more severe hyperglycaemia.  
5  
6 The characteristics of metformin-treated mothers differed from those of insulin-treated  
7 mothers as they were more likely to be obese but had lower glucose concentrations at  
8 diagnosis.  
9  
10  
11  
12  
13  
14  
15  
16  
17  
18  
19  
20  
21  
22  
23  
24  
25  
26  
27  
28  
29  
30  
31  
32  
33  
34  
35  
36  
37  
38  
39  
40  
41  
42  
43  
44  
45  
46  
47  
48  
49  
50  
51  
52  
53  
54  
55  
56  
57  
58  
59  
60

For peer review only

### Strengths and limitations of this study

- This study was based on a large sample of women diagnosed with GDM in a centre where universal GDM screening is in place
- Data used for this study captured a key transitional period in GDM management as metformin was introduced as an additional pharmaceutical treatment option
- The mainly bi-ethnic nature of the sample allowed for the exploration of ethnic differences in GDM treatment between Pakistani and White British women
- The generalisability of the findings might be limited by the fact that this was a single-centre observational study
- The number of women treated with supplemental metformin was relatively small compared to the two other treatment types



## Introduction

Gestational diabetes mellitus (GDM) is one of the most common complications of pregnancy [1]. In 2019, the International Diabetes Federation estimated that 13.2% of pregnancies, or 17 million live births, were affected by GDM worldwide [2]. The reported prevalence of GDM is 5% in the United Kingdom (UK) [3]. Ethnicity is a risk factor for GDM and in particular, South Asian (SA) women have been shown to have a higher risk for GDM than White women [4–6]. The public health significance of GDM lies in the intergenerational cycle of diabetes and obesity risk it perpetuates as GDM is associated with both maternal complications (e.g. pre-eclampsia, caesarean delivery) and health risks for the offspring (e.g. macrosomia, childhood obesity) [7].

Guidelines for initial GDM management recommend lifestyle changes (dietary and exercise advice) [8,9]. While these changes are largely effective, hyperglycaemia persists for 15-30% of women and supplemental pharmacological treatment is required [8]. Historically, subcutaneous insulin was the first-line pharmacological agent [8]. However, metformin has been increasingly accepted following the Metformin in Gestational diabetes (MiG) trial that validated it as a safe alternative to insulin [10], despite uncertainties regarding its long-term effects on offspring health [11]. In the UK, both the 2008 and 2015 National Institute for Health and Care Excellence (NICE) guidelines initially recommend metformin for GDM treatment and insulin is suggested when metformin is contraindicated, not tolerated or ineffective [9].

With the aim to inform clinical management of GDM, previous research has investigated the characteristics associated with the need for supplemental pharmacological treatment in

1  
2  
3 mothers with GDM [12–18]. High maternal body mass index (BMI), history of GDM,  
4 advanced age and adverse oral glucose tolerance test (OGTT) were amongst factors  
5 increasing the probability of receiving pharmacological treatment compared to lifestyle  
6 changes advice alone. However, there is still limited evidence of the associations between  
7 maternal characteristics and GDM pharmaceutical treatment in the UK [17–21]. Also, despite  
8 the known differences in the risk of GDM between SA and White women, the differences in  
9 their risk for GDM pharmaceutical treatment relative to lifestyle changes advice remain  
10 largely under researched [13,22].  
11  
12  
13  
14  
15  
16  
17  
18  
19  
20  
21  
22  
23  
24

25 Using a largely bi-ethnic UK birth cohort that included women with GDM treated both before  
26 and after metformin introduction, this study aimed to identify the maternal characteristics  
27 associated with GDM pharmacological treatment.  
28  
29  
30  
31  
32  
33  
34  
35

## 36 **Methods**

### 37 Study

38 Born in Bradford (BiB) is a longitudinal prospective birth cohort study [23]. Bradford, a city  
39 in the north of England, constitutes a multi-ethnic population of more than 500,000  
40 individuals, with 20% of the population of South Asian origin. Data were collected between  
41 2007 and 2010 from 12,453 women (and their partners and offspring) booked for delivery at  
42 the Bradford Royal Infirmary [24]. Ethical approval for the study was granted by Bradford  
43 Research Ethics Committee (Ref 07/H1302/112).  
44  
45  
46  
47  
48  
49  
50  
51  
52  
53  
54  
55  
56  
57  
58  
59  
60

### Patient and public involvement

This was a secondary analysis of data from the BiB cohort. BiB has a number of established community advisory groups who are involved in the design, conduct, reporting and dissemination of findings from the Born in Bradford research programme.

### Sample

Our sample comprised 762 women with data on maternal characteristics (Figure 1). Cohort participants diagnosed with GDM in a singleton pregnancy were included if they received (i) lifestyle changes advice only, (ii) lifestyle changes advice with supplementary insulin or (iii) lifestyle changes advice supplemented by metformin. We excluded GDM treatment combinations (e.g., lifestyle changes advice supplemented by both metformin and insulin treatment) that did not yield sufficient numbers for meaningful analyses to be conducted. Participants with GDM for whom treatment was not recorded were excluded. If mothers had more than one singleton pregnancy affected and treated for GDM during the study, we only included the first pregnancy. Singleton pregnancies not affected by GDM and higher order pregnancies (twins, triplets) whether or not affected by GDM were excluded from the study, as were women with pre-existing diabetes.

### Screening and diagnosis of GDM

All women enrolled in the BiB study were offered GDM screening. This was conducted between 26 and 28 weeks of gestation using the 2-hour 75g OGTT and 80% of women attended their appointment [24]. Diagnosis of GDM was made using the modified 1999 World Health Organisation (WHO) criteria in accordance with local recommendations at the

1  
2  
3 time of recruitment (fasting glucose concentration  $\geq 6.1$  mmol/L and/or 2-hour post-load  
4  
5 glucose  $\geq 7.8$  mmol/L) [25].  
6  
7  
8  
9

### 10 11 Management and treatment of GDM 12

13  
14 Local procedure meant that all women were referred to the joint obstetric diabetes clinic  
15 following a diagnosis of GDM. Women were educated in dietary and exercise changes and  
16 capillary glucose monitoring. Individualized dietary recommendations were provided by a  
17 dietician and daily walking for at least 30 minutes was recommended. If glucose targets were  
18 achieved after a week (fasting plasma glucose: 4.0-5.5 mmol/L; 2-hour postprandial:  
19  $\leq 7.5$  mmol/L), lifestyle changes were continued without additional pharmacological  
20 treatment. If hyperglycaemia persisted, treatment was supplemented with insulin injections  
21 until delivery in the first part of the study (04/2007-03/2009). Following metformin  
22 introduction (04/2009), both insulin injections and metformin tablets (850 mg, twice daily)  
23 were pharmacological prescription options.  
24  
25  
26  
27  
28  
29  
30  
31  
32  
33  
34  
35  
36  
37  
38  
39  
40

### 41 Study outcome: GDM treatment type 42

43  
44 The three reported treatment options evaluated in our study were: counselling for lifestyle  
45 changes, insulin and metformin. Lifestyle changes consisted of diet and exercise. Insulin and  
46 metformin groups included women who initially received lifestyle changes advice followed  
47 by supplementary insulin and metformin treatment, respectively.  
48  
49  
50  
51  
52  
53  
54  
55  
56  
57  
58  
59  
60

## Maternal characteristics

### *Socio-demographic characteristics*

Seven socio-demographic characteristics were considered: age at childbirth, marital and cohabitation status, ethnicity (White British, Pakistani, other), employment status (previously, currently, or never employed), migration status, educational levels, and parity. These were self-reported using interviewer-administered questionnaires at booking conducted in English or South Asian languages (e.g., Bengali, Punjabi). Ethnicity was grouped according to the UK Office of National Statistics guidelines [26]. Education levels corresponded to  $\leq$ five General Certificate of Secondary Education (GCSE) qualification, A level equivalent, higher than A level and other/unknown. Migration status was classified in two groups: mother was born in the UK or moved to the UK at  $\leq$ five years old and mother moved to the UK  $>$ five years of age. Marital and cohabitation status was defined as married and living with a partner, not married and living with a partner or not living with a partner.

### *Lifestyle and health characteristics*

Nine lifestyle and health variables were analysed: BMI at booking, smoking during pregnancy (yes/no), physical activity levels, family history of diabetes (yes/no), history of GDM before the study (yes/no), pre-existing hypertension (yes/no), gestational age and blood glucose concentrations at OGTT (fasting and 2-hour post-load) and start date of treatment relative to metformin introduction (before/after). Maternal BMI was obtained from height and weight measurements conducted at recruitment using Leicester Height Measure and SECA digital scales. Family history of diabetes, history of GDM and pre-existing hypertension were self-reported. Gestational age was recorded, and plasma glucose levels were measured at OGTT using a glucose oxidase method. Maternal physical activity levels (inactive,

1  
2  
3 moderately inactive, moderately active, active) were self-reported using the UK General  
4 Practice Physical Activity Questionnaire [27].  
5  
6  
7  
8  
9

### 10 11 Statistical analysis

12  
13  
14 Analyses were based on two time periods to account for the fact that metformin was used for  
15 GDM treatment in the study from April 2009 onwards, which is two years after the first  
16 women with GDM were offered lifestyle changes advice with or without insulin treatment in  
17 the cohort.  
18  
19  
20  
21  
22

23  
24  
25  
26  
27 *Overall study period: April 2007 – February 2011*

### 28 29 *Descriptive analysis*

30  
31  
32 Using the whole study sample, we considered two treatment types: lifestyle changes advice  
33 and pharmaceutical treatment (i.e., insulin- and metformin-treated women were grouped).  
34 Differences in maternal characteristics between women receiving lifestyle changes advice  
35 alone and those receiving supplemental pharmaceutical treatment were explored using the  
36 Mann-Whitney U test for continuous variables and Chi-square (or Fisher's exact) test for  
37 categorical variables. The Holm-Bonferroni correction adjusted for multiple testing [28,29].  
38  
39  
40  
41  
42  
43  
44  
45  
46  
47  
48  
49

### 50 51 *Regression analysis*

52  
53 Variable selection for the binary logistic regression model was conducted using the least  
54 absolute shrinkage and selection operator (LASSO) which shrinks less stable coefficients  
55 exactly to zero, allowing for the selection of a more parsimonious model [30]. For each  
56  
57  
58  
59  
60

1  
2  
3 maternal characteristic selected through LASSO, a regression model was fitted to assess the  
4 unadjusted relationships between maternal characteristic and GDM pharmaceutical treatment,  
5 relative to lifestyle changes advice. The associations between maternal characteristics and  
6 GDM treatment were further assessed in a fully adjusted model, including all maternal  
7 characteristics.  
8  
9  
10  
11  
12  
13  
14  
15  
16  
17

### 18 *Sensitivity analysis*

19  
20  
21 Given the higher risk for insulin resistance and GDM in Pakistani women compared to White  
22 British women in the BiB cohort [31], we reproduced the whole sample analysis but stratified  
23 by ethnicity, to evaluate whether the associations between maternal characteristics and GDM  
24 pharmaceutical treatment were influenced by ethnicity. Differences in maternal  
25 characteristics between White British and Pakistani women were also examined.  
26  
27  
28  
29  
30  
31  
32  
33  
34  
35

36 *Period after metformin introduction: April 2009 – February 2011*

### 37 *Descriptive analysis*

38  
39  
40 Using the subsample of women who started GDM treatment after metformin introduction, we  
41 considered three treatment types: lifestyle changes advice, insulin, and metformin. The  
42 differences in the LASSO-selected maternal characteristics were examined by GDM  
43 treatment type. The Kruskal-Wallis test was used for continuous variables and the Chi-square  
44 (or Fisher's exact) test was used for categorical variables. The Holm-Bonferroni correction  
45 adjusted for multiple testing [28,29].  
46  
47  
48  
49  
50  
51  
52  
53  
54  
55  
56  
57  
58  
59  
60

### *Regression analysis*

The relationships between maternal characteristics and insulin and metformin treatment were evaluated compared to lifestyle changes advice alone, in a multinomial logistic regression model including the LASSO-selected characteristics. The same multinomial logistic regression was fitted but using insulin as the reference group, to examine the maternal characteristics associated with metformin rather than insulin (the associations between maternal characteristics and lifestyle changes advice relative to insulin were omitted).

Analyses were conducted using R (R 3.4.1 & R Studio 1.0.153 for Windows) and Stata/SE software (Stata/SE 15 for Windows; StataCorp, College Station, TX, USA).

### **Results**

A total of 844 women were diagnosed with GDM in a singleton pregnancy. 82 women who did not meet treatment inclusion criteria were excluded, leading to a sample of 762 women (Figure 1).

#### Overall study period: lifestyle changes vs pharmaceutical treatment

32% of women received lifestyle changes advice alone and 68% received supplemental pharmacological treatment during the study (Table 1). Women who were prescribed pharmacological treatment were older at childbirth (median age: 31.7 years (interquartile range, IQR: 7.6) compared to women receiving lifestyle changes advice (29.9 years (8.1)), they were more hyperglycaemic at OGTT and had higher obesity rates (41.7% vs 19.0%).



1  
2  
3 These differences remained statistically significant after accounting for multiple testing  
4  
5 (Table 1).  
6  
7  
8  
9

10  
11 A total of 12 maternal characteristics were selected via LASSO and these were included in  
12  
13 the regression analysis (Table 2). Unadjusted analysis showed that obese women had five  
14  
15 times the odds of being reported to have been offered pharmaceutical treatment (OR 4.6  
16  
17 (95% CI 2.8, 7.5)) than lifestyle changes advice. The odds of pharmaceutical treatment  
18  
19 compared to lifestyle changes advice were 2.6 (1.2, 5.5) times higher for women who smoked  
20  
21 during pregnancy and 2.1 (1.6, 2.7) greater for women who had higher fasting glucose  
22  
23 concentrations at OGTT. Relative to White British women, Pakistani women were predicted  
24  
25 to have lower odds of being prescribed pharmaceutical treatment (OR 0.7 (0.4, 1.0)) (Table  
26  
27  
28  
29  
30  
31  
32  
33  
34  
35  
36  
37  
38  
39  
40  
41  
42  
43  
44  
45  
46  
47  
48  
49  
50  
51  
52  
53  
54  
55  
56  
57  
58  
59  
60  
2). Obesity and smoking were less prevalent among Pakistani women than White British  
women (Supplementary Table 1).

Fully adjusted analyses confirmed that obesity, smoking and higher glucose concentrations at  
diagnosis were associated with higher odds of pharmaceutical treatment although the  
estimates were attenuated (Table 2). Adjusting for fasting glucose weakened the relationships  
between obesity and pharmaceutical treatment. Adjustments for ethnicity brought the  
estimates for smoking closer towards the null.

The sensitivity analysis showed that for both White British and Pakistani women, higher  
glucose concentrations at OGTT and obesity were associated with an increase in the odds of  
being prescribed pharmaceutical treatment relative to lifestyle changes advice alone  
(Supplementary Table 2).

### Period after metformin introduction: lifestyle changes advice vs insulin vs metformin

After metformin introduction, 31.1% of women received lifestyle changes advice alone, 50.5% were prescribed supplemental insulin and 18.4% were offered supplemental metformin (Table 3). Mothers in the lifestyle changes group were more likely to be younger, less hyperglycaemic and have a lower BMI than women receiving supplemental insulin or metformin.

Relative to lifestyle changes advice, the risk of insulin treatment was 2.3 times higher for both obese women and women with higher fasting glucose concentrations at OGTT (Table 4). The risk of insulin treatment relative to lifestyle changes advice was also higher for women who smoked during pregnancy compared to those who did not smoke. Supplemental metformin treatment rather than lifestyle changes advice alone was 7.3 times (2.7, 20.0) more likely for obese women.

Compared to insulin treatment, the risk of metformin was three times higher for both obese compared to normal weight women and Pakistani women compared to White British women (Table 4). Higher fasting glucose concentrations at OGTT were associated with a lower risk (RRR 0.3 (0.2, 0.6)) of a record of receiving metformin treatment relative to insulin.

## **Discussion**

Our study showed that obesity, smoking and higher glucose concentrations at OGTT were key maternal characteristics associated with supplemental pharmaceutical treatment

1  
2  
3 compared to lifestyle changes advice alone. Ethnic differences were also identified as,  
4  
5 relative to White British women, Pakistani women were less likely to receive pharmaceutical  
6  
7 treatment as a whole than lifestyle changes advice. Among women who received  
8  
9 pharmaceutical treatment, metformin was more likely to be prescribed to obese women than  
10  
11 normal weight women and to Pakistani women than White British women. Women who were  
12  
13 more hyperglycaemic at diagnosis were more likely to be prescribed insulin rather than  
14  
15 metformin.  
16  
17  
18  
19  
20  
21  
22

23 Lifestyle changes advice supplemented by pharmaceutical treatment was the most common  
24  
25 form of GDM management in our study. This contrasted with previous studies in which  
26  
27 mothers with GDM were more frequently managed with lifestyle changes advice [12,14–  
28  
29 17,32–34]. These disparities could be due to differences in GDM diagnostic criteria: the  
30  
31 modified 1999 WHO criteria in our study used higher fasting glucose thresholds at OGTT but  
32  
33 lower 2-hour thresholds than other criteria in by previous studies [12,16,34]. Additionally, the  
34  
35 higher rates of pharmaceutical treatment in our study could reflect the higher risk profile of  
36  
37 the BiB population and also, the high levels of deprivation in Bradford [24] could have  
38  
39 limited health literacy and the adherence to lifestyle changes advice [35].  
40  
41  
42  
43  
44  
45  
46

47 Obesity, smoking during pregnancy and glucose concentrations at OGTT were the maternal  
48  
49 characteristics most strongly associated with GDM supplemental pharmaceutical treatment in  
50  
51 comparison to lifestyle changes advice alone. Previous research has also reported BMI as a  
52  
53 risk factor for GDM pharmaceutical treatment, notably insulin. Although the specificity of  
54  
55 these studies largely varied (e.g., location, sample size, screening methods, diagnostic  
56  
57 thresholds), they consistently showed that as maternal BMI increased, so did the risk of being  
58  
59  
60

1  
2  
3 treated with insulin [12–15,32,34,36–38]. Regarding the associations between smoking and  
4  
5 GDM treatment, some studies showed that more smokers were treated with insulin than  
6  
7 lifestyle changes [15,33,39], whilst others found an opposite relationship [38,40], although  
8  
9 the differences between groups in these studies were not reported to be statistically  
10  
11 significant. A more recent study has reported that smoking was associated with a higher risk  
12  
13 of insulin treatment, although this was relative to women without GDM and women with  
14  
15 GDM not requiring insulin treatment combined in the same control group [41].  
16  
17  
18  
19  
20  
21  
22

23 We hypothesise that the mechanisms explaining the associations between obesity, smoking,  
24  
25 glucose concentrations at OGTT and GDM pharmaceutical treatment in our sample are  
26  
27 closely related to obesity- and smoking-induced insulin resistance. Obesity may alter the  
28  
29 functioning of pancreatic  $\beta$ -cells and exacerbates insulin resistance (which is already  
30  
31 increased as a result of pregnancy) [22,38,42–45]. Smoking has also been associated with  
32  
33 insulin resistance, via processes including hormonal secretions (e.g. growth hormone) that  
34  
35 counteract insulin action [46,47]. Thus, although there was no direct measure of insulin  
36  
37 resistance in this study, it is possible that women who were obese or smoked during  
38  
39 pregnancy had a higher degree of insulin resistance. Additionally, in line with other studies  
40  
41 [34,48–50], we found that women who were prescribed pharmaceutical treatment were more  
42  
43 likely to be more severely hyperglycaemic compared to women who received lifestyle  
44  
45 changes advice alone. As increases in insulin resistance and  $\beta$ -cell dysfunction can further  
46  
47 lead to higher glucose concentrations at the OGTT [51–53], the severity of insulin resistance  
48  
49 and its associated greater severity of hyperglycaemia in obese women and those who smoked  
50  
51 could have been such that lifestyle changes advice alone were insufficient to achieve glucose  
52  
53 targets. In that sense, our results accurately reflect clinical practice in Bradford as the  
54  
55 decision to prescribe pharmaceutical treatment was based on the finding of glucose levels  
56  
57  
58  
59  
60

1  
2  
3 higher than the glucose targets. Further, what our study suggests is that the severity of  
4 hyperglycaemia may mediate the relationships between maternal obesity and smoking and  
5 GDM pharmaceutical treatment. This was confirmed by individual adjustment for fasting  
6 glucose which attenuated the relationships between obesity and GDM pharmaceutical  
7 treatment. although this attenuation was less evident for the relationships between smoking  
8 and GDM pharmaceutical treatment possibly due to the low proportion of smokers.  
9  
10  
11  
12  
13  
14  
15  
16  
17  
18  
19  
20

21 Another important finding of this study is that, relative to White British women, Pakistani  
22 women were predicted to have a lower risk for pharmaceutical treatment (when insulin and  
23 metformin treatment were grouped) compared to lifestyle changes alone. This may seem  
24 counterintuitive given SA women are more prone to insulin resistance than White European  
25 women due to a greater susceptibility to store adipose tissue viscerally rather than  
26 subcutaneously [6,54]. Wong and Jalaludin (2012) and Wong (2011) have also described that  
27 SA women had a lower risk to be prescribed with supplemental insulin rather than lifestyle  
28 changes advice alone than Anglo-Europeans. The authors suggested that this may be due to  
29 differences between the two ethnic groups in the placental factors impacting, late in the  
30 pregnancy, on the severity of insulin resistance [13,22]. Underlying ethnic differences in  
31 dietary habits during pregnancy and adherence to treatment could also be contributing factors  
32 [22]. In the context of our study however, Pakistani mothers were less likely to report  
33 smoking and had lower BMI compared to White British women which was consistent with  
34 previous research in the BiB cohort [24,55,56]. This, combined with the fact that obesity and  
35 smoking were strongly associated with GDM pharmaceutical treatment in our study, may  
36 explain why Pakistani women were less likely to receive pharmaceutical treatment rather than  
37 lifestyle changes advice alone compared to White British women. The stratified analysis  
38 however showed that higher maternal BMI and glucose concentration at OGTT were  
39  
40  
41  
42  
43  
44  
45  
46  
47  
48  
49  
50  
51  
52  
53  
54  
55  
56  
57  
58  
59  
60

1  
2  
3 associated with a higher risk for pharmaceutical treatment relative to lifestyle changes advice,  
4  
5 irrespective of maternal ethnicity.  
6  
7  
8  
9

10  
11 The addition of metformin to the set of pharmacological options was not associated, at the  
12 time of the study, with any substantial shift in GDM management as insulin remained the  
13 most common prescribed treatment. Nevertheless, we found that, obese women were more  
14 likely to be treated with metformin rather than insulin which is in line with a study by  
15 McGrath *et al.* (2018). This perhaps is the result of clinical decision-making as metformin,  
16 compared to insulin, has been associated with lower weight gain [57] thus metformin could  
17 preferably be given to women with higher BMI. Further, we found that women with more  
18 severe hyperglycaemia were more likely to be prescribed insulin rather than metformin,  
19 which corroborated previous research [58–60]. As metformin is believed to act less rapidly  
20 than insulin [18], it may be that in our study, even after metformin introduction, women with  
21 a higher severity of hyperglycaemia were preferentially prescribed insulin to promptly restore  
22 euglycaemia. Thus, it is somewhat surprising that Pakistani mothers, characteristically more  
23 hyperglycaemic and with lower BMI than White British women, were predicted to have a  
24 higher risk for metformin treatment compared to insulin than White British women. This may  
25 reflect individual treatment preference for metformin treatment as insulin injections are  
26 considered by mothers with GDM to be invasive and burdensome [61] and can be associated  
27 with social stigma within SA communities [62]. More research regarding the ethnic  
28 differences between metformin- and insulin-treated mothers with GDM would be needed to  
29 ascertain this finding.  
30  
31  
32  
33  
34  
35  
36  
37  
38  
39  
40  
41  
42  
43  
44  
45  
46  
47  
48  
49  
50  
51  
52  
53  
54  
55  
56  
57  
58  
59  
60

1  
2  
3 The main strength of this study is that the findings are based on a large sample of women  
4 diagnosed with GDM from a cohort where universal GDM screening was in place. The data  
5 originated from a single diabetes clinic in the UK managed by the same senior clinician and  
6 where the same diagnostic criteria and glucose targets for GDM management were used  
7 throughout the study. This minimised bias related to differences in clinical practice and  
8 decisions between clinics. Another strength of our study is that, unlike previous studies that  
9 explored maternal characteristics of GDM treatment either before or after metformin  
10 introduction, our data captured GDM management both pre- and post-metformin  
11 introduction. This allowed for an analysis of the maternal characteristics associated with  
12 GDM pharmacological treatment during a key transitional period of changes in GDM  
13 management within the BiB cohort. Lastly, the mainly bi-ethnic nature of the BiB cohort  
14 enabled the assessment of the effect of being Pakistani, relative to White British, on the risk  
15 for GDM pharmaceutical treatment which is particularly important given Pakistani mothers  
16 have a higher risk of developing GDM itself.  
17  
18  
19  
20  
21  
22  
23  
24  
25  
26  
27  
28  
29  
30  
31  
32  
33  
34  
35  
36  
37  
38

39 Our findings are however limited by the relatively small sample of women treated with  
40 metformin at the time of the BiB study compared to the other treatment types which means  
41 that our results must be interpreted with caution. We acknowledge that the generalisability  
42 of our results may be limited by the fact that this is a single-centre observational study,  
43 although our findings remained largely consistent with previous research.  
44  
45  
46  
47  
48  
49  
50  
51  
52  
53

54 To conclude, in the UK BiB cohort, women who received GDM supplemental  
55 pharmaceutical treatment rather than lifestyle changes advice alone were more likely to be  
56 obese, smokers, more hyperglycaemic and White British. Among women who received  
57  
58  
59  
60

1  
2  
3 pharmaceutical treatment, the risk for metformin treatment was higher for Pakistani women  
4  
5 and obese women, whilst women who were more hyperglycaemic were more likely to be  
6  
7 prescribed insulin. Evaluation of the relationships between GDM treatment and maternal or  
8  
9 offspring outcomes in the BiB cohort would thus have to account for the maternal  
10  
11 determinants of GDM pharmaceutical treatment identified in this study.  
12  
13  
14  
15  
16  
17  
18  
19  
20  
21  
22  
23  
24  
25  
26  
27  
28  
29  
30  
31  
32  
33  
34  
35  
36  
37  
38  
39  
40  
41  
42  
43  
44  
45  
46  
47  
48  
49  
50  
51  
52  
53  
54  
55  
56  
57  
58  
59  
60

For peer review only



## Acknowledgements

Born in Bradford is only possible because of the enthusiasm and commitment of the children and parents in BiB. We are grateful to all the participants, health professionals, schools and researchers who have made Born in Bradford happen.

## Declarations

## Funding

This research was funded by Loughborough University and supported by the National Institute for Health Research (NIHR) Leicester Biomedical Research Centre. E.S.P. and W.J. acknowledge support from the National Institute for Health Research (NIHR) Leicester Biomedical Research Centre, which is a partnership between University Hospitals of Leicester NHS Trust, Loughborough University, and the University of Leicester. W.J. is supported by a UK Medical Research Council (MRC) New Investigator Research Grant (MR/P023347/1). Born in Bradford received funding from a Wellcome Trust infrastructure grant (WT101597MA), the National Institute for Health Research under its Collaboration for Applied Health Research and Care (CLAHRC) (IS-CLA-0113-10020). The NIHR Clinical Research Network which provided research delivery support for this study.

The views expressed in this paper are those of the authors and not necessarily those of the NIHR.

## Authors' contribution

G.M-E. wrote the manuscript and was responsible for the acquisition, analysis, and interpretation of data. E.S.P. and W.J. revised the manuscript and contributed to the

1  
2  
3 acquisition, analysis, and interpretation of data. E.H. contributed to the analysis and  
4  
5 interpretation of data and reviewed the manuscript. M.H. reviewed the manuscript. G.M-E.,  
6  
7 W.J. and E.S.P. are guarantors of this work and, as such, had full access to all the data in the  
8  
9 study and take responsibility for the integrity of the data and the accuracy of the data  
10  
11 analysis.  
12  
13  
14  
15  
16  
17

### 18 **Declarations of interest**

19  
20  
21 None  
22  
23  
24  
25  
26

### 27 **Data availability**

28  
29  
30 Scientists are encouraged and able to use BiB data. Data requests are made to the BiB  
31  
32 executive using the form available from the study website <http://www.borninbradford.nhs.uk>.  
33  
34 Guidance for researchers and collaborators, the study protocol and the data collection  
35  
36 schedule are all available via the website. All requests are carefully considered and accepted  
37  
38 where possible.  
39  
40  
41  
42  
43  
44

### 45 **Ethics approval**

46  
47  
48 Ethical approval for the study was granted by Bradford Research Ethics Committee (Ref  
49  
50 07/H1302/112).  
51  
52  
53  
54  
55

### 56 **Informed consent**

57  
58  
59 All participants provided written consent for the BiB study.  
60

## References

- 1 American Diabetes Association. Diagnosis and Classification of Diabetes Mellitus. *Diabetes Care* 2008;**31**:S55–60. doi:10.2337/dc08-S055
- 2 International Diabetes Federation. *IDF Diabetes Atlas 2019*. 2019. <http://www.idf.org/about-diabetes/facts-figures>
- 3 Diabetes UK. Us, diabetes and a lot of facts and stats. London: 2019. [www.diabetes.org.uk](http://www.diabetes.org.uk)
- 4 Farrar D, Fairley L, Santorelli G, *et al*. Association between hyperglycaemia and adverse perinatal outcomes in south Asian and white British women: Analysis of data from the Born in Bradford cohort. *Lancet Diabetes Endocrinol* 2015;**3**:795–804. doi:10.1016/S2213-8587(15)00255-7
- 5 Anand SS, Gupta M, Teo KK, *et al*. Causes and consequences of gestational diabetes in South Asians living in Canada: results from a prospective cohort study. *C Open* 2017;**5**:E604–11. doi:10.9778/cmajo.20170027
- 6 Makgoba M, Savvidou MD, Steer PJ. An analysis of the interrelationship between maternal age, body mass index and racial origin in the development of gestational diabetes mellitus. *BJOG An Int J Obstet Gynaecol* 2012;**119**:276–82. doi:10.1111/j.1471-0528.2011.03156.x
- 7 Chen L, Mayo R, Chatry A, *et al*. Gestational Diabetes Mellitus: Its Epidemiology and Implication beyond Pregnancy. *Curr Epidemiol Reports* 2016;**3**:1–11. doi:10.1007/s40471-016-0063-y
- 8 American Diabetes Association. Management of diabetes in pregnancy: Standards of medical care in diabetes. *Diabetes Care* 2019;**42**:S165–72. doi:10.2337/dc19-S014
- 9 National Institute for Health and Care Excellence. Diabetes in pregnancy : management from preconception to the postnatal period. 2015. <https://www.nice.org.uk/guidance/ng3>
- 10 Rowan JA, Hague WM, Gao W, *et al*. Metformin versus Insulin for the Treatment of Gestational Diabetes. *N Engl J Med* 2008;**358**:2003–15. doi:10.1056/NEJMoa0707193
- 11 Lindsay RS, Loeken MR. Metformin use in pregnancy: promises and uncertainties. *Diabetologia* 2017;**60**:1612–9. doi:10.1007/s00125-017-4351-y
- 12 Barnes RA, Wong T, Ross GP, *et al*. A novel validated model for the prediction of insulin therapy initiation and adverse perinatal outcomes in women with gestational diabetes mellitus. *Diabetologia* 2016;**59**:2331–8. doi:10.1007/s00125-016-4047-8
- 13 Wong VW, Jalaludin B. Gestational diabetes mellitus: Who requires insulin therapy? *Aust New Zeal J Obstet Gynaecol* 2011;**51**:432–6. doi:10.1111/j.1479-828X.2011.01329.x
- 14 Aktun LH, Yorgunlar B, Karaca N, *et al*. Predictive Risk Factors in the Treatment of Gestational Diabetes Mellitus. *Clin Med Insights Women's Heal* 2015;**8**:CMWH.S31564. doi:10.4137/cmwh.s31564
- 15 González-Quintero VH, Istwan NB, Rhea DJ, *et al*. Antenatal Factors Predicting

- 1  
2  
3 Subsequent Need for Insulin Treatment in Women with Gestational Diabetes. *J*  
4 *Women's Heal* 2008;**17**:1183–7. doi:10.1089/jwh.2007.0667  
5
- 6 16 Zhang Y, Shao J, Li F, *et al.* Factors in Gestational Diabetes Mellitus Predicting the  
7 Needs for Insulin Therapy. *Int J Endocrinol* 2016;**2016**:1–5.  
8 doi:10.1155/2016/4858976  
9
- 10 17 Ali A, Shastry S, Nithiyananthan R, *et al.* Gestational diabetes–Predictors of response  
11 to treatment and obstetric outcome. *Eur J Obstet Gynecol Reprod Biol* 2018;**220**:57–  
12 60. doi:10.1016/j.ejogrb.2017.11.014  
13
- 14 18 Khin MO, Gates S, Saravanan P. Predictors of metformin failure in gestational  
15 diabetes mellitus (GDM). *Diabetes Metab Syndr Clin Res Rev* 2018;**12**:405–10.  
16 doi:10.1016/j.dsx.2018.01.003  
17
- 18 19 Gandhi P, Bustani R, Madhuvrata P, *et al.* Introduction of metformin for gestational  
19 diabetes mellitus in clinical practice: Has it had an impact? *Eur J Obstet Gynecol*  
20 *Reprod Biol* 2012;**160**:147–50. doi:10.1016/j.ejogrb.2011.11.018  
21
- 22 20 Balani J, Hyer S, Johnson A, *et al.* Pregnancy outcomes after metformin treatment for  
23 gestational diabetes: a case-control study. *Obstet Med* Published Online First: 2012.  
24 doi:10.1258/om.2012.110092  
25
- 26 21 Balani J, Hyer SL, Rodin DA, *et al.* Pregnancy outcomes in women with gestational  
27 diabetes treated with metformin or insulin: A case-control study. *Diabet Med*  
28 2009;**26**:798–802. doi:10.1111/j.1464-5491.2009.02780.x  
29
- 30 22 Wong VW. Gestational diabetes mellitus in five ethnic groups: A comparison of their  
31 clinical characteristics. *Diabet Med* 2012;**29**:366–71. doi:10.1111/j.1464-  
32 5491.2011.03439.x  
33
- 34 23 Raynor P, Duley L, Small N, *et al.* Born in Bradford, a cohort study of babies born in  
35 Bradford, and their parents: Protocol for the recruitment phase. *BMC Public Health*  
36 2008;**8**:1–13. doi:10.1186/1471-2458-8-327  
37
- 38 24 Wright J, Small N, Raynor P, *et al.* Cohort profile: The born in bradford multi-ethnic  
39 family cohort study. *Int J Epidemiol* 2013;**42**:978–91. doi:10.1093/ije/dys112  
40
- 41 25 World Health Organisation. Definition, diagnosis and classification of diabetes  
42 mellitus and its complications. Report of a WHO consultation. Part 1: diagnosis and  
43 classification of diabetes mellitus. <https://apps.who.int/iris/handle/10665/66040>  
44
- 45 26 Office for National Statistics. Ethnic group statistics: a guide for the collection and  
46 classification of ethnicity data - Office for National Statistics. Off. Natl. Stat.  
47 2003.<https://www.ons.gov.uk/methodology/classificationsandstandards/measuringequa>  
48 [lity/ethnicgroupnationalidentityandreligion](https://www.ons.gov.uk/methodology/classificationsandstandards/measuringequa)  
49
- 50 27 National Health Service . The General Practice Physical Activity Questionnaire  
51 (GPPAQ): A screening tool to assess adult physical activity levels, within primary  
52 care. 2009. doi:10.1007/s00330-011-2164-9  
53
- 54 28 Holm S. A Simple Sequentially Rejective Multiple Test Procedure. *Scand J Stat*  
55 1979;**6**:65–70.  
56
- 57 29 Gaetano J. Holm-Bonferroni sequential correction: An EXCEL calculator (1.1)  
58 [Microsoft Excel workbook].  
59  
60

- 1  
2  
3 [https://www.researchgate.net/publication/236969037\\_Holm-](https://www.researchgate.net/publication/236969037_Holm-Bonferroni_Sequential_Correction_An_EXCEL_Calculator)  
4 [Bonferroni\\_Sequential\\_Correction\\_An\\_EXCEL\\_Calculator](https://www.researchgate.net/publication/236969037_Holm-Bonferroni_Sequential_Correction_An_EXCEL_Calculator). 2013.  
5
- 6 30 Vincent M, Hansen NR. Sparse group lasso and high dimensional multinomial  
7 classification. *Comput Stat Data Anal* 2014;**71**:771–86.  
8 doi:10.1016/j.csda.2013.06.004  
9
- 10 31 West J, Lawlor DA, Fairley L, *et al*. Differences in socioeconomic position, lifestyle  
11 and health-related pregnancy characteristics between Pakistani and White British  
12 women in the Born in Bradford prospective cohort study: The influence of the  
13 woman's, her partner's and their parents' place. *BMJ Open* 2014;**4**.  
14 doi:10.1136/bmjopen-2014-004805  
15
- 16 32 Koning SH, Scheuneman KA, Lutgers HL, *et al*. Risk stratification for healthcare  
17 planning in women with gestational diabetes mellitus. *Neth J Med* 2016;**74**:262–9.  
18
- 19 33 Sapienza AD, Francisco RPV, Trindade TC, *et al*. Factors predicting the need for  
20 insulin therapy in patients with gestational diabetes mellitus. *Diabetes Res Clin Pract*  
21 2010;**88**:81–6. doi:10.1016/j.diabres.2009.12.023  
22
- 23 34 Nishikawa T, Ono K, Hashimoto S, *et al*. One-hour oral glucose tolerance test plasma  
24 glucose at gestational diabetes diagnosis is a common predictor of the need for insulin  
25 therapy in pregnancy and postpartum impaired glucose tolerance. *J Diabetes Investig*  
26 2018;**9**:1370–7. doi:10.1111/jdi.12848  
27
- 28 35 Draffin CR, Alderdice FA, McCance DR, *et al*. Exploring the needs, concerns and  
29 knowledge of women diagnosed with gestational diabetes: A qualitative study.  
30 *Midwifery* 2016;**40**:141–7. doi:10.1016/j.midw.2016.06.019  
31
- 32 36 Pertot T, Molyneaux L, Tan K, *et al*. Can common clinical parameters be used to  
33 identify patients who will need insulin treatment in gestational diabetes mellitus?  
34 *Diabetes Care* 2011;**34**:2214–6. doi:10.2337/dc11-0499  
35
- 36 37 Bakiner O, Bozkirli E, Ozsahin K, *et al*. Risk Factors That can Predict Antenatal  
37 Insulin Need in Gestational Diabetes. *J Clin Med Res* 2013;**5**:381–8.  
38 doi:10.4021/jocmr1515w  
39
- 40 38 Yanagisawa K, Muraoka M, Takagi K, *et al*. Assessment of predictors of insulin  
41 therapy in patients with gestational diabetes diagnosed according to the IADPSG  
42 criteria. *Diabetol Int* 2016;**7**:440–6. doi:10.1007/s13340-016-0272-0  
43
- 44 39 Lemieux L, Ryan EA. The Need for Insulin in Subjects With Impaired Glucose  
45 Tolerance of Pregnancy. *Can J Diabetes* 2004;**28**:196–  
46 200. [https://www.researchgate.net/publication/289150216\\_The\\_need\\_for\\_insulin\\_in\\_s](https://www.researchgate.net/publication/289150216_The_need_for_insulin_in_subjects_with_impaired_glucose_tolerance_of_pregnancy)  
47 [ubjects\\_with\\_impaired\\_glucose\\_tolerance\\_of\\_pregnancy](https://www.researchgate.net/publication/289150216_The_need_for_insulin_in_subjects_with_impaired_glucose_tolerance_of_pregnancy)  
48
- 49 40 Akinci B, Celtik A, Yener S, *et al*. Is fasting glucose level during oral glucose  
50 tolerance test an indicator of the insulin need in gestational diabetes? *Diabetes Res*  
51 *Clin Pract* 2008;**82**:219–25. doi:10.1016/j.diabres.2008.07.023  
52
- 53 41 Kim MK, Han K, You SY, *et al*. Prepregnancy smoking and the risk of gestational  
54 diabetes requiring insulin therapy. *Sci Rep* Published Online First: 2020.  
55 doi:10.1038/s41598-020-70873-7  
56
- 57 42 Pertot T, Molyneaux L, Tan K, *et al*. Can common clinical parameters be used to  
58 identify patients who will need insulin treatment in gestational diabetes mellitus?  
59  
60

- 1  
2  
3  
4  
5  
6  
7  
8  
9  
10  
11  
12  
13  
14  
15  
16  
17  
18  
19  
20  
21  
22  
23  
24  
25  
26  
27  
28  
29  
30  
31  
32  
33  
34  
35  
36  
37  
38  
39  
40  
41  
42  
43  
44  
45  
46  
47  
48  
49  
50  
51  
52  
53  
54  
55  
56  
57  
58  
59  
60
- Diabetes Care* 2011;**34**:2214–6. doi:10.2337/dc11-0499
- 43 Ketumarn N, Boriboonhirunsarn D. Characteristics of abnormal oral glucose tolerance test in GDM diagnosis and clinical correlation. *J Matern Neonatal Med* 2018;**31**:2109–14. doi:10.1080/14767058.2017.1336224
- 44 Sapienza AD, Francisco RPV, Trindade TC, *et al.* Factors predicting the need for insulin therapy in patients with gestational diabetes mellitus. *Diabetes Res Clin Pract* 2010;**88**:81–6. doi:10.1016/j.diabres.2009.12.023
- 45 Catalano PM. Obesity, insulin resistance, and pregnancy outcome. *REPRODUCTION* 2010;**140**:365–71. doi:10.1530/REP-10-0088
- 46 Artese A, Stamford BA, Moffatt RJ. Cigarette Smoking: An Accessory to the Development of Insulin Resistance. *Am J Lifestyle Med* Published Online First: 2019. doi:10.1177/1559827617726516
- 47 Sliwinska-Mosson M, Milnerowicz H. The impact of smoking on the development of diabetes and its complications. *Diabetes Vasc Dis Res* 2017;**14**:265–76. doi:10.1177/1479164117701876
- 48 Ito Y, Shibuya M, Hosokawa S, *et al.* Indicators of the need for insulin treatment and the effect of treatment for gestational diabetes on pregnancy outcomes in Japan. *Endocr J* 2016;**63**:231–7. doi:10.1507/endocrj.EJ15-0427
- 49 Watanabe M, Katayama A, Kagawa H, *et al.* Risk Factors for the Requirement of Antenatal Insulin Treatment in Gestational Diabetes Mellitus. *J Diabetes Res* 2016;**2016**:1–6. doi:10.1155/2016/9648798
- 50 Zhang Y, Shao J, Li F, *et al.* Factors in Gestational Diabetes Mellitus Predicting the Needs for Insulin Therapy. *Int J Endocrinol* 2016;**2016**:1–5. doi:10.1155/2016/4858976
- 51 Abdul-Ghani MA, Matsuda M, Jani R, *et al.* The relationship between fasting hyperglycemia and insulin secretion in subjects with normal or impaired glucose tolerance. *Am J Physiol - Endocrinol Metab* 2008;**295**. doi:10.1152/ajpendo.00674.2007
- 52 Sokup A, Ruszkowska-Ciastek B, Góralczyk K, *et al.* Insulin resistance as estimated by the homeostatic method at diagnosis of gestational diabetes: Estimation of disease severity and therapeutic needs in a population-based study. *BMC Endocr Disord* 2013;**13**. doi:10.1186/1472-6823-13-21
- 53 Saisho Y, Miyakoshi K, Tanaka M, *et al.* Beta cell dysfunction and its clinical significance in gestational diabetes. *Endocr J* 2010;**57**:973–80. doi:http://dx.doi.org/10.1507/endocrj.K10E-231
- 54 Sniderman AD, Bhopal R, Prabhakaran D, *et al.* Why might South Asians be so susceptible to central obesity and its atherogenic consequences? The adipose tissue overflow hypothesis. *Int J Epidemiol* 2007;**36**:220–5. doi:10.1093/ije/dyl245
- 55 West J, Santorelli G, Whincup PH, *et al.* Association of maternal exposures with adiposity at age 4/5 years in white British and Pakistani children: findings from the Born in Bradford study. *Diabetologia* 2018;**61**:242–52. doi:10.1007/s00125-017-4457-2



- 1  
2  
3 56 Lawlor DA, West J, Fairley L, *et al.* Pregnancy glycaemia and cord-blood levels of  
4 insulin and leptin in Pakistani and white British mother-offspring pairs: Findings from  
5 a prospective pregnancy cohort. *Diabetologia* 2014;**57**:2492–500. doi:10.1007/s00125-  
6 014-3386-6  
7  
8 57 Balsells M, Garcia-Patterson A, Sola I, *et al.* Glibenclamide, metformin, and insulin  
9 for the treatment of gestational diabetes: a systematic review and meta-analysis. *Bmj*  
10 2015;**350**:h102–h102. doi:10.1136/bmj.h102  
11  
12 58 McGrath R, Glastras S, Scott E, *et al.* Outcomes for Women with Gestational Diabetes  
13 Treated with Metformin: A Retrospective, Case-Control Study. *J Clin Med* 2018;**7**:50.  
14 doi:10.3390/jcm7030050  
15  
16 59 Goh JEL, Sadler L, Rowan J. Metformin for gestational diabetes in routine clinical  
17 practice. *Diabet Med* 2011;**28**:1082–7. doi:10.1111/j.1464-5491.2011.03361.x  
18  
19 60 Ijas H, Vaarasmaki M, Morin-Papunen L, *et al.* Metformin should be considered in the  
20 treatment of gestational diabetes: A prospective randomised study. *BJOG An Int J*  
21 *Obstet Gynaecol* 2010;**118**:880–5. doi:10.1111/j.1471-0528.2010.02763.x  
22  
23 61 Latif L, Hyer S, Shehata H. Metformin effects on treatment satisfaction and quality of  
24 life in gestational diabetes. *Br J Diabetes Vasc Dis* 2013;**13**:178–82.  
25 doi:10.1177/1474651413493933  
26  
27 62 Kumar K, Greenfield S, Raza K, *et al.* Understanding adherence-related beliefs about  
28 medicine amongst patients of South Asian origin with diabetes and cardiovascular  
29 disease patients: A qualitative synthesis. *BMC Endocr Disord* Published Online First:  
30 2016. doi:10.1186/s12902-016-0103-0  
31  
32  
33  
34  
35  
36  
37  
38  
39  
40  
41  
42  
43  
44  
45  
46  
47  
48  
49  
50  
51  
52  
53  
54  
55  
56  
57  
58  
59  
60

**Table 1** Maternal characteristics by GDM treatment type across the whole study period (2007-2011)

|                                                                    | <b>Lifestyle changes advice (n=244)</b> | <b>Pharmaceutical treatment (n=518)</b> | <i>p</i> | <i>p</i> * | <b>n (%) Missing</b> |
|--------------------------------------------------------------------|-----------------------------------------|-----------------------------------------|----------|------------|----------------------|
| <b>Start date of treatment<sup>‡</sup>, n (%)</b>                  |                                         |                                         | 0.486    | >0.999     | 4 (0.5)              |
| Before metformin introduction (2007-09)                            | 121 (49.6)                              | 241 (47)                                |          |            |                      |
| After metformin introduction (2009-11)                             | 123 (50.4)                              | 273 (53)                                |          |            |                      |
| <b>Age at childbirth<sup>†</sup> (years), median (IQR)</b>         | 29.9 (8.1)                              | 31.7 (7.6)                              | <0.001   | 0.001      | 0                    |
| <b>BMI at booking<sup>†</sup> (kg/m<sup>2</sup>), median (IQR)</b> | 25.2 (6.0)                              | 28.4 (7.9)                              | <0.001   | <0.001     | 46 (6.0)             |
| <b>BMI category at booking<sup>‡</sup>, n (%)</b>                  |                                         |                                         | <0.001   | <0.001     | 46 (6.0)             |
| Underweight ( <i>BMI</i> <18.5 kg/m <sup>2</sup> )                 | 7 (3.0)                                 | 7 (1.4)                                 |          |            |                      |
| Normal weight (18.5≤ <i>BMI</i> ≤24.9 kg/m <sup>2</sup> )          | 107 (46.1)                              | 122 (25.2)                              |          |            |                      |
| Overweight (25.0≤ <i>BMI</i> ≤29.9 kg/m <sup>2</sup> )             | 74 (31.9)                               | 153 (31.6)                              |          |            |                      |
| Obese ( <i>BMI</i> ≥30.0 kg/m <sup>2</sup> )                       | 44 (19.0)                               | 202 (41.7)                              |          |            |                      |
| <b>Smoking during pregnancy<sup>‡</sup>, n (%)</b>                 |                                         |                                         | 0.008    | 0.096      | 1 (0.1)              |
| Yes                                                                | 11 (4.5)                                | 53 (10.2)                               |          |            |                      |
| No                                                                 | 233 (95.5)                              | 464 (89.8)                              |          |            |                      |
| <b>Parity<sup>‡</sup>, n (%)</b>                                   |                                         |                                         | 0.671    | >0.999     | 24 (3.1)             |
| 0                                                                  | 88 (37.0)                               | 164 (32.8)                              |          |            |                      |
| 1                                                                  | 53 (22.3)                               | 119 (23.8)                              |          |            |                      |
| 2                                                                  | 41 (17.2)                               | 99 (19.8)                               |          |            |                      |
| 3+                                                                 | 56 (23.5)                               | 118 (23.6)                              |          |            |                      |
| <b>Physical activity levels<sup>‡</sup>, n (%)</b>                 |                                         |                                         | 0.684    | >0.999     | 109 (14)             |
| Inactive                                                           | 134 (62.3)                              | 285 (65.1)                              |          |            |                      |
| Moderately inactive                                                | 37 (17.2)                               | 77 (17.6)                               |          |            |                      |
| Moderately active                                                  | 35 (16.3)                               | 56 (12.8)                               |          |            |                      |
| Active                                                             | 9 (4.2)                                 | 20 (4.6)                                |          |            |                      |
| <b>Ethnic group<sup>‡</sup>, n (%)</b>                             |                                         |                                         | 0.060    | 0.540      | 0                    |
| White British                                                      | 47 (19.3)                               | 140 (27.0)                              |          |            |                      |
| Pakistani                                                          | 152 (62.3)                              | 298 (57.5)                              |          |            |                      |
| Other                                                              | 45 (18.4)                               | 80 (15.4)                               |          |            |                      |
| <b>Migration status<sup>‡</sup>, n (%)</b>                         |                                         |                                         | 0.253    | >0.999     | 13 (1.7)             |
| Born in the UK or moved ≤ 5 years                                  | 121 (51.3)                              | 286 (55.7)                              |          |            |                      |
| Moved to the UK > 5 years                                          | 115 (48.7)                              | 227 (44.2)                              |          |            |                      |
| <b>Marital and cohabitation status<sup>‡</sup>, n (%)</b>          |                                         |                                         | 0.239    | >0.999     | 0                    |
| Married and living with partner                                    | 198 (81.1)                              | 411 (79.3)                              |          |            |                      |
| Not married and living with partner                                | 21 (8.6)                                | 64 (12.4)                               |          |            |                      |
| Not living with partner                                            | 25 (10.2)                               | 43 (8.3)                                |          |            |                      |
| <b>Highest educational qualification<sup>‡</sup>, n (%)</b>        |                                         |                                         | 0.528    | >0.999     | 4 (0.5)              |
| 5 GCSE equivalent or less                                          | 124 (51.0)                              | 273 (53.0)                              |          |            |                      |
| A-level equivalent                                                 | 28 (11.5)                               | 57 (11.1)                               |          |            |                      |
| Higher than A-level                                                | 76 (31.3)                               | 141 (27.4)                              |          |            |                      |
| Other/Unknown                                                      | 15 (6.2)                                | 44 (8.5)                                |          |            |                      |
| <b>Family history of diabetes<sup>‡</sup>, n (%)</b>               |                                         |                                         | 0.010    | 0.100      | 63 (8.3)             |
| Yes                                                                | 128 (57.7)                              | 323 (67.7)                              |          |            |                      |
| No                                                                 | 94 (42.3)                               | 154 (32.3)                              |          |            |                      |



|                                                                                       |            |            |        |        |          |
|---------------------------------------------------------------------------------------|------------|------------|--------|--------|----------|
| <b>Pre-existing hypertension<sup>§</sup>, n (%)</b>                                   |            |            | 0.563  | >0.999 | 53 (7.0) |
| Yes                                                                                   | 3 (1.3)    | 10 (2.1)   |        |        |          |
| No                                                                                    | 228 (98.7) | 468 (97.9) |        |        |          |
| <b>History of GDM before the study<sup>‡</sup>, n (%)</b>                             |            |            | 0.075  | 0.600  | 93 (12)  |
| Yes                                                                                   | 10 (4.6)   | 38 (8.4)   |        |        |          |
| No                                                                                    | 207 (95.4) | 414 (91.6) |        |        |          |
| <b>Mother's employment status<sup>‡</sup>, n (%)</b>                                  |            |            | 0.008  | 0.096  | 0        |
| Currently employed                                                                    | 90 (36.9)  | 203 (39.2) |        |        |          |
| Previously employed                                                                   | 55 (22.5)  | 159 (30.7) |        |        |          |
| Never employed                                                                        | 99 (40.6)  | 156 (30.1) |        |        |          |
| <b>Gestational age at OGTT<sup>†</sup> (weeks), median (IQR)</b>                      | 26.4 (1.6) | 26.3 (0.8) | 0.006  | 0.078  | 13 (1.7) |
| <b>Fasting glucose concentrations at OGTT<sup>†</sup> (mmol/L), median (IQR)</b>      | 4.7 (0.7)  | 5.1 (1.1)  | <0.001 | <0.001 | 13 (1.7) |
| <b>2h post-load glucose concentrations at OGTT<sup>†</sup> (mmol/L), median (IQR)</b> | 8.2 (0.8)  | 8.6 (1.6)  | <0.001 | <0.001 | 13 (1.7) |

A-level: UK highest qualification in high school; BMI: body mass index; GCSE: general certificate of secondary education;

OGTT: oral glucose tolerance test

Continuous data presented as median and interquartile range (IQR).

Categorical data presented as frequencies and percentages.

\*Adjusted *P*-value after Holm-Bonferroni correction

<sup>†</sup>Mann-Whitney U test

<sup>‡</sup>Chi-square test

**Table 2** Associations between maternal characteristics and pharmaceutical treatment of GDM relative to lifestyle changes advice

|                                                     | <b>Pharmaceutical treatment (n=372)</b> |          |                                 |          |
|-----------------------------------------------------|-----------------------------------------|----------|---------------------------------|----------|
|                                                     | <i>Unadjusted OR<br/>(95% CI)</i>       | <i>p</i> | <i>Adjusted OR<br/>(95% CI)</i> | <i>p</i> |
| <b>Mother age at childbirth (years)</b>             | 1.1 (1.0, 1.1)                          | <0.001   | 1.1 (1.0, 1.1)                  | <0.001   |
| <b>BMI categories at booking (kg/m<sup>2</sup>)</b> |                                         |          |                                 |          |
| Normal weight                                       | <i>Reference</i>                        |          | <i>Reference</i>                |          |
| Underweight                                         | 0.8 (0.2, 2.4)                          | 0.663    | 1.2 (0.4, 4.3)                  | 0.725    |
| Overweight                                          | 1.8 (1.1, 2.7)                          | 0.008    | 1.3 (0.8, 2.0)                  | 0.353    |
| Obese                                               | 4.6 (2.8, 7.5)                          | <0.001   | 3.0 (1.7, 5.2)                  | <0.001   |
| <b>Parity</b>                                       |                                         |          |                                 |          |
| 0                                                   | <i>Reference</i>                        |          | <i>Reference</i>                |          |
| 1                                                   | 1.2 (0.7, 1.9)                          | 0.475    | 0.6 (0.4, 1.1)                  | 0.142    |
| 2                                                   | 1.1 (0.7, 1.9)                          | 0.588    | 0.6 (0.3, 1.1)                  | 0.096    |
| 3+                                                  | 1.3 (0.8, 2.2)                          | 0.225    | 0.4 (0.2, 0.9)                  | 0.022    |
| <b>Ethnic origin</b>                                |                                         |          |                                 |          |
| White British                                       | <i>Reference</i>                        |          | <i>Reference</i>                |          |
| Pakistani                                           | 0.7 (0.4, 1.0)                          | 0.081    | 0.6 (0.3, 1.2)                  | 0.135    |
| Other                                               | 0.5 (0.3, 0.9)                          | 0.020    | 0.4 (0.2, 0.8)                  | 0.015    |
| <b>Highest educational qualification</b>            |                                         |          |                                 |          |
| 5 GCSE equivalent or less                           | <i>Reference</i>                        |          | <i>Reference</i>                |          |
| A-level equivalent                                  | 0.8 (0.5, 1.5)                          | 0.554    | 0.7 (0.3, 1.3)                  | 0.250    |
| Higher than A-level                                 | 0.8 (0.5, 1.2)                          | 0.219    | 0.7 (0.4, 1.2)                  | 0.171    |
| Other/Unknown                                       | 1.0 (0.5, 2.0)                          | 0.996    | 0.7 (0.3, 1.6)                  | 0.396    |
| <b>Employment status</b>                            |                                         |          |                                 |          |
| Currently employed                                  | <i>Reference</i>                        |          | <i>Reference</i>                |          |
| Previously employed                                 | 1.4 (0.9, 2.2)                          | 0.161    | 1.1 (0.6, 2.1)                  | 0.649    |
| Never employed                                      | 0.7 (0.5, 1.1)                          | 0.139    | 0.7 (0.4, 1.3)                  | 0.244    |
| <b>Physical activity levels</b>                     |                                         |          |                                 |          |
| Active                                              | <i>Reference</i>                        |          | <i>Reference</i>                |          |
| Moderately active                                   | 0.7 (0.3, 1.9)                          | 0.538    | 0.7 (0.2, 1.9)                  | 0.467    |
| Moderately inactive                                 | 1.1 (0.4, 2.8)                          | 0.793    | 1.1 (0.4, 3.0)                  | 0.905    |
| Inactive                                            | 1.0 (0.4, 2.4)                          | 0.919    | 1.1 (0.4, 2.9)                  | 0.882    |
| <b>Smoking during pregnancy</b>                     | 2.6 (1.2, 5.5)                          | 0.011    | 1.9 (0.8, 4.5)                  | 0.140    |
| <b>Family history of diabetes</b>                   | 1.3 (0.9, 1.9)                          | 0.156    | 1.2 (0.8, 1.9)                  | 0.337    |
| <b>Gestational age at OGTT (weeks)</b>              | 0.9 (0.8, 0.9)                          | 0.004    | 0.9 (0.8, 1.0)                  | 0.045    |
| <b>Fasting glucose at OGTT (mmol/L)</b>             | 2.1 (1.6, 2.7)                          | <0.001   | 1.7 (1.3, 2.3)                  | <0.001   |
| <b>2h post-load glucose at OGTT (mmol/L)</b>        | 1.5 (1.2, 1.7)                          | <0.001   | 1.4 (1.1, 1.7)                  | <0.001   |

A-level: UK highest qualification in high school; BMI: body mass index; GCSE: general certificate of secondary education (UK standard minimum level of education); OGTT: oral glucose tolerance test

**Table 3** Maternal characteristics by GDM treatment type after metformin introduction (2009-2011)

|                                                                                       | <b>Lifestyle changes advice (n=123)</b> | <b>Insulin (n=200)</b> | <b>Metformin (n=73)</b> | <b><i>p</i></b> | <b><i>p</i>*</b> | <b>n (%) missing</b> |
|---------------------------------------------------------------------------------------|-----------------------------------------|------------------------|-------------------------|-----------------|------------------|----------------------|
| <b>Age at childbirth<sup>†</sup> (years), median (IQR)</b>                            | 29.1 (7.8)                              | 31.8 (8.2)             | 30.6 (9.0)              | <0.001          | 0.004            | 0                    |
| <b>BMI at booking<sup>†</sup> (kg/m<sup>2</sup>), median (IQR)</b>                    | 24.7 (4.9)                              | 28.1 (9.2)             | 29.3 (6.5)              | <0.001          | 0.001            | 21 (2.8)             |
| <b>BMI category at booking<sup>§</sup>, n (%)</b>                                     |                                         |                        |                         | <0.001          | <0.001           | 21 (2.8)             |
| Underweight ( <i>BMI</i> <18.5 kg/m <sup>2</sup> )                                    | 4 (3.4)                                 | 5 (2.7)                | 0                       |                 |                  |                      |
| Normal weight (18.5≤ <i>BMI</i> ≤24.9 kg/m <sup>2</sup> )                             | 57 (48.3)                               | 55 (29.3)              | 16 (23.2)               |                 |                  |                      |
| Overweight (25.0≤ <i>BMI</i> ≤29.9 kg/m <sup>2</sup> )                                | 40 (33.9)                               | 51 (27.1)              | 22 (31.9)               |                 |                  |                      |
| Obese ( <i>BMI</i> ≥30.0 kg/m <sup>2</sup> )                                          | 17 (14.4)                               | 77 (41.0)              | 31 (44.9)               |                 |                  |                      |
| <b>Smoking during pregnancy<sup>‡</sup>, n (%)</b>                                    |                                         |                        |                         | 0.004           | 0.032            | 0                    |
| Yes                                                                                   | 4 (3.3)                                 | 29 (14.5)              | 6 (8.2)                 |                 |                  |                      |
| No                                                                                    | 119 (96.7)                              | 171 (85.5)             | 67 (91.8)               |                 |                  |                      |
| <b>Parity<sup>‡</sup> n (%)</b>                                                       |                                         |                        |                         | 0.145           | 0.580            | 6 (0.8)              |
| 0                                                                                     | 52 (43.0)                               | 68 (34.5)              | 22 (30.6)               |                 |                  |                      |
| 1                                                                                     | 26 (21.5)                               | 46 (23.3)              | 21 (29.2)               |                 |                  |                      |
| 2                                                                                     | 18 (14.9)                               | 35 (17.8)              | 19 (26.4)               |                 |                  |                      |
| 3+                                                                                    | 25 (20.7)                               | 48 (24.4)              | 10 (13.9)               |                 |                  |                      |
| <b>Physical activity levels<sup>‡</sup> n (%)</b>                                     |                                         |                        |                         | 0.424           | 0.630            | 1 (0.1)              |
| Inactive                                                                              | 71 (57.7)                               | 116 (58.3)             | 43 (58.9)               |                 |                  |                      |
| Moderately inactive                                                                   | 23 (18.7)                               | 43 (21.6)              | 9 (12.3)                |                 |                  |                      |
| Moderately active                                                                     | 22 (17.9)                               | 30 (15.1)              | 13 (17.8)               |                 |                  |                      |
| Active                                                                                | 7 (5.7)                                 | 10 (5.0)               | 8 (11.0)                |                 |                  |                      |
| <b>Ethnic group<sup>‡</sup> n (%)</b>                                                 |                                         |                        |                         | 0.210           | 0.630            | 0                    |
| White British                                                                         | 24 (19.5)                               | 54 (27.0)              | 15 (20.5)               |                 |                  |                      |
| Pakistani                                                                             | 74 (60.2)                               | 113 (56.5)             | 50 (68.5)               |                 |                  |                      |
| Other                                                                                 | 25 (20.3)                               | 33 (16.5)              | 8 (11.0)                |                 |                  |                      |
| <b>Highest educational qualification<sup>‡</sup> n (%)</b>                            |                                         |                        |                         | 0.297           | 0.630            | 0                    |
| 5 GCSE equivalent or less                                                             | 53 (43.1)                               | 104 (52.0)             | 32 (43.8)               |                 |                  |                      |
| A-level equivalent                                                                    | 17 (13.8)                               | 27 (13.5)              | 7 (9.6)                 |                 |                  |                      |
| Higher than A-level                                                                   | 44 (35.8)                               | 55 (27.5)              | 31 (42.5)               |                 |                  |                      |
| Other/Unknown                                                                         | 9 (7.3)                                 | 14 (7.0)               | 3 (4.1)                 |                 |                  |                      |
| <b>Family history of diabetes<sup>‡</sup> n (%)</b>                                   |                                         |                        |                         | 0.099           | 0.553            | 27 (3.5)             |
| Yes                                                                                   | 65 (57.0)                               | 130 (69.1)             | 42 (62.7)               |                 |                  |                      |
| No                                                                                    | 49 (43.0)                               | 58 (30.8)              | 25 (37.3)               |                 |                  |                      |
| <b>Mother's employment status<sup>‡</sup> n (%)</b>                                   |                                         |                        |                         | 0.079           | 0.553            | 0                    |
| Currently employed                                                                    | 48 (39.0)                               | 80 (40.0)              | 28 (38.4)               |                 |                  |                      |
| Previously employed                                                                   | 19 (15.4)                               | 54 (27.0)              | 20 (27.4)               |                 |                  |                      |
| Never employed                                                                        | 56 (45.5)                               | 66 (33.0)              | 25 (34.2)               |                 |                  |                      |
| <b>Gestational age at OGTT<sup>†</sup> (weeks), median (IQR)</b>                      | 26.3 (1.8)                              | 26.1 (0.8)             | 26.3 (0.7)              | 0.087           | 0.553            | 8 (1.0)              |
| <b>Fasting glucose concentrations at OGTT<sup>†</sup> (mmol/L), median (IQR)</b>      | 4.7 (0.8)                               | 5.2 (1.2)              | 4.8 (0.7)               | <0.001          | 0.001            | 8 (1.0)              |
| <b>2h post-load glucose concentrations at OGTT<sup>†</sup> (mmol/L), median (IQR)</b> | 8.2 (0.8)                               | 8.6 (1.6)              | 8.4 (1.3)               | <0.001          | 0.001            | 8 (1.0)              |

A-level: UK highest qualification in high school; BMI: body mass index; GCSE: general certificate of secondary education; OGTT: oral glucose tolerance test

Continuous data presented as median and interquartile range (IQR).

Categorical data presented as frequencies and percentages.

\*Adjusted *P*-values after Holm-Bonferroni correction

<sup>†</sup>Kruskal-Wallis test

<sup>‡</sup>Chi-square test

<sup>§</sup>Fisher's exact test

1

2

**Table 4** Associations between maternal characteristics and GDM pharmaceutical treatment after metformin introduction

|                                                     | Lifestyle changes advice | Insulin               |        | Metformin             |        | Insulin          | Metformin             |        |
|-----------------------------------------------------|--------------------------|-----------------------|--------|-----------------------|--------|------------------|-----------------------|--------|
|                                                     |                          | Adjusted RRR (95% CI) | p      | Adjusted RRR (95% CI) | p      |                  | Adjusted RRR (95% CI) | p      |
| <b>Mother age at childbirth (years)</b>             | <i>Reference</i>         | 1.1 (1.0, 1.2)        | 0.001  | 1.0 (1.0, 1.1)        | 0.160  | <i>Reference</i> | 0.9 (0.9, 1.0)        | 0.141  |
| <b>BMI categories at booking (kg/m<sup>2</sup>)</b> |                          | <i>Reference</i>      |        | <i>Reference</i>      |        | <i>Reference</i> |                       |        |
| Normal weight                                       |                          |                       |        |                       |        |                  |                       |        |
| Underweight                                         |                          | 1.8 (0.4, 9.1)        | 0.444  | -                     | -      |                  | -                     | -      |
| Overweight                                          |                          | 0.6 (0.3, 1.3)        | 0.221  | 1.6 (0.6, 4.0)        | 0.290  |                  | 2.6 (1.0, 6.4)        | 0.044  |
| Obese                                               |                          | 2.3 (1.0, 5.2)        | 0.051  | 7.3 (2.7, 20.0)       | <0.001 |                  | 3.2 (1.3, 7.8)        | 0.010  |
| <b>Parity</b>                                       |                          | <i>Reference</i>      |        | <i>Reference</i>      |        | <i>Reference</i> |                       |        |
| 0                                                   |                          |                       |        |                       |        |                  |                       |        |
| 1                                                   |                          | 0.6 (0.3, 1.4)        | 0.234  | 0.8 (0.3, 2.2)        | 0.704  |                  | 1.3 (0.5, 3.3)        | 0.524  |
| 2                                                   |                          | 0.5 (0.2, 1.4)        | 0.204  | 1.1 (0.4, 3.2)        | 0.817  |                  | 2.1 (0.8, 5.5)        | 0.143  |
| 3+                                                  |                          | 0.6 (0.2, 1.8)        | 0.398  | 0.4 (0.1, 1.6)        | 0.210  |                  | 0.7 (0.2, 2.2)        | 0.521  |
| <b>Ethnic origin</b>                                |                          | <i>Reference</i>      |        | <i>Reference</i>      |        | <i>Reference</i> |                       |        |
| White British                                       |                          |                       |        |                       |        |                  |                       |        |
| Pakistani                                           |                          | 0.5 (0.2, 1.4)        | 0.197  | 1.7 (0.5, 5.5)        | 0.359  |                  | 3.2 (1.1, 9.3)        | 0.031  |
| Other                                               |                          | 0.5 (0.2, 1.4)        | 0.187  | 0.7 (0.2, 2.6)        | 0.618  |                  | 1.4 (0.4, 4.7)        | 0.605  |
| <b>Highest educational qualification</b>            |                          | <i>Reference</i>      |        | <i>Reference</i>      |        | <i>Reference</i> |                       |        |
| GCSE equivalent or less                             |                          |                       |        |                       |        |                  |                       |        |
| A-level equivalent                                  |                          | 0.6 (0.2, 1.6)        | 0.360  | 0.5 (0.1, 1.9)        | 0.325  |                  | 0.8 (0.2, 2.7)        | 0.756  |
| Higher than A-level                                 |                          | 0.6 (0.3, 1.4)        | 0.271  | 1.0 (0.4, 2.6)        | 0.925  |                  | 1.6 (0.7, 3.7)        | 0.281  |
| Other/Unknown                                       |                          | 0.8 (0.2, 2.4)        | 0.645  | 0.4 (0.08, 1.7)       | 0.208  |                  | 0.5 (0.1, 2.1)        | 0.328  |
| <b>Employment status</b>                            |                          | <i>Reference</i>      |        | <i>Reference</i>      |        | <i>Reference</i> |                       |        |
| Currently employed                                  |                          |                       |        |                       |        |                  |                       |        |
| Previously employed                                 |                          | 1.6 (0.6, 3.9)        | 0.297  | 1.7 (0.6, 5.0)        | 0.306  |                  | 1.1 (0.4, 2.8)        | 0.866  |
| Never employed                                      |                          | 0.8 (0.3, 1.9)        | 0.613  | 0.7 (0.2, 2.3)        | 0.617  |                  | 0.9 (0.3, 2.7)        | 0.922  |
| <b>Physical activity levels</b>                     |                          | <i>Reference</i>      |        | <i>Reference</i>      |        | <i>Reference</i> |                       |        |
| Active                                              |                          |                       |        |                       |        |                  |                       |        |
| Moderately active                                   |                          | 0.5 (0.1, 2.0)        | 0.374  | 0.4 (0.09, 1.8)       | 0.231  |                  | 0.7 (0.2, 2.9)        | 0.647  |
| Moderately inactive                                 |                          | 1.0 (0.3, 3.5)        | 0.957  | 0.2 (0.05, 1.1)       | 0.063  |                  | 0.2 (0.05, 1.0)       | 0.051  |
| Inactive                                            |                          | 0.8 (0.2, 3.0)        | 0.809  | 0.5 (0.1, 2.1)        | 0.328  |                  | 0.6 (0.1, 2.2)        | 0.405  |
| <b>Smoking during pregnancy</b>                     |                          | 4.1 (1.0, 16.9)       | 0.048  | 1.9 (0.3, 11.7)       | 0.474  |                  | 0.5 (0.1, 1.8)        | 0.270  |
| <b>Family history of diabetes</b>                   |                          | 1.2 (0.6, 2.2)        | 0.554  | 1.0 (0.5, 2.1)        | 0.959  |                  | 0.8 (0.4, 1.7)        | 0.652  |
| <b>Gestational age at OGTT (weeks)</b>              |                          | 0.9 (0.8, 1.1)        | 0.364  | 1.0 (0.8, 1.1)        | 0.747  |                  | 1.0 (0.9, 1.2)        | 0.644  |
| <b>Fasting glucose at OGTT (mmol/L)</b>             |                          | 2.3 (1.5, 3.6)        | <0.001 | 0.8 (0.4, 1.4)        | 0.456  |                  | 0.3 (0.2, 0.6)        | <0.001 |
| <b>2-h post-load glucose at OGTT (mmol/L)</b>       |                          | 1.2 (0.9, 1.7)        | 0.127  | 1.2 (0.9, 1.8)        | 0.245  |                  | 1.0 (0.7, 1.3)        | 0.968  |

BMI: body mass index; CI: confidence interval; OGTT: oral glucose tolerance test, RRR: relative risk ratio

49

50

51

52

53

54

55

56

57

58

59

60

Figure 1 legend: Flowchart of study participation

For peer review only

1  
2  
3  
4  
5  
6  
7  
8  
9  
10  
11  
12  
13  
14  
15  
16  
17  
18  
19  
20  
21  
22  
23  
24  
25  
26  
27  
28  
29  
30  
31  
32  
33  
34  
35  
36  
37  
38  
39  
40  
41  
42  
43  
44  
45  
46  
47  
48  
49  
50  
51  
52  
53  
54  
55  
56  
57  
58  
59  
60

1  
2  
3  
4  
5  
6  
7  
8  
9  
10  
11  
12  
13  
14  
15  
16  
17  
18  
19  
20  
21  
22  
23  
24  
25  
26  
27  
28  
29  
30  
31  
32  
33  
34  
35  
36  
37  
38  
39  
40  
41  
42  
43  
44  
45  
46  
47  
48  
49  
50  
51  
52  
53  
54  
55  
56  
57  
58  
59  
60

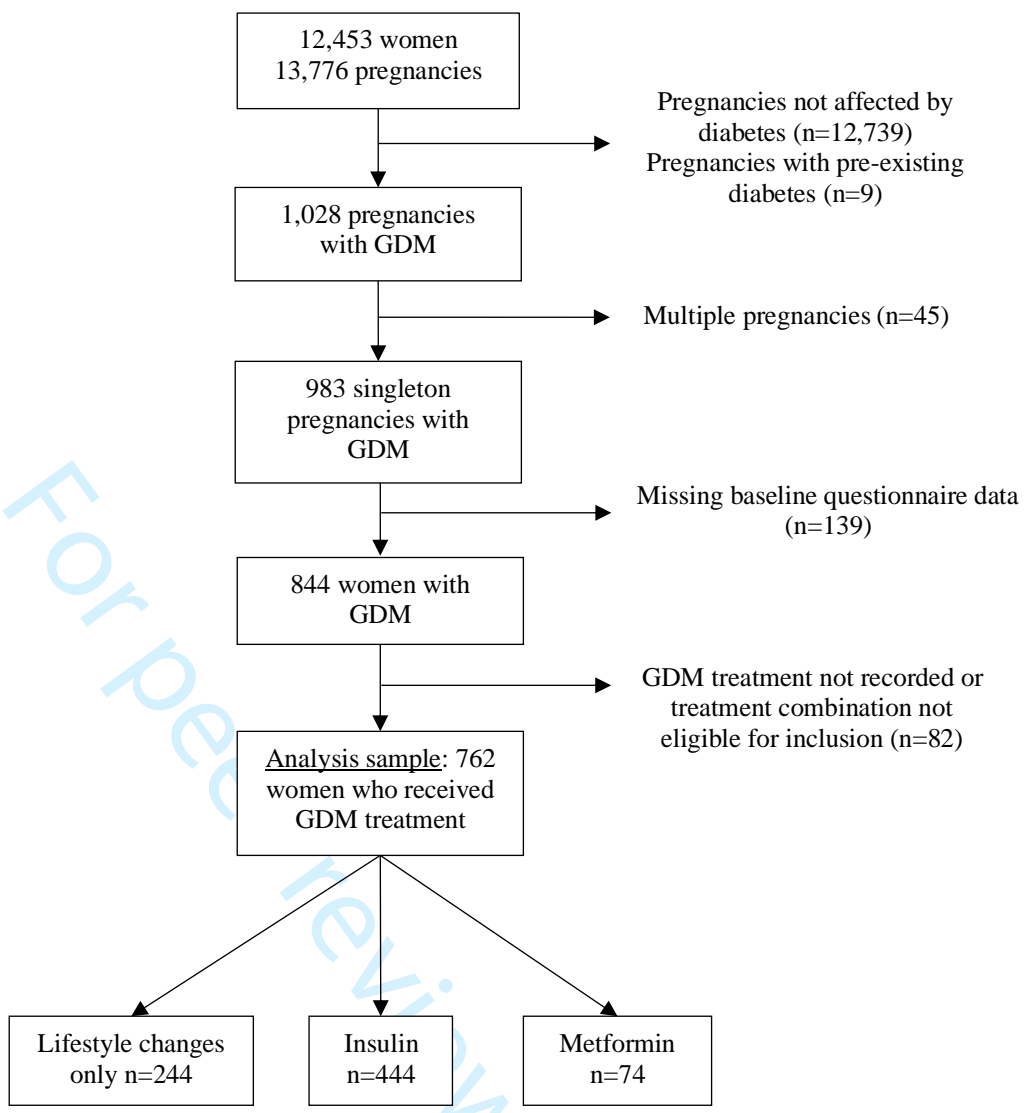

Figure 1 Flowchart of study participation

**Supplementary Table 1** Maternal characteristics by maternal ethnicity

|                                                                           | <b>White<br/>British<br/>(n=142)</b> | <b>Pakistani<br/>(n=324)</b> |
|---------------------------------------------------------------------------|--------------------------------------|------------------------------|
| <b>GDM treatment, n (%)</b>                                               |                                      |                              |
| Lifestyle changes advice alone                                            | 37 (26.1)                            | 111 (34.3)                   |
| Pharmaceutical treatment                                                  | 105 (73.9)                           | 213 (65.7)                   |
| <b>Age at childbirth (years), median (IQR)</b>                            | 30.0 (9.4)                           | 30.8 (7.4)                   |
| <b>BMI at booking (kg/m<sup>2</sup>), median (IQR)</b>                    | 27.9 (10.5)                          | 26.9 (7.1)                   |
| <b>BMI category at booking, n (%)</b>                                     |                                      |                              |
| Underweight ( <i>BMI</i> < 18.5 kg/m <sup>2</sup> )                       | 2 (1.4)                              | 7 (2.2)                      |
| Normal weight ( <i>18.5</i> ≤ <i>BMI</i> ≤ 24.9 kg/m <sup>2</sup> )       | 53 (37.3)                            | 99 (30.6)                    |
| Overweight ( <i>25.0</i> ≤ <i>BMI</i> ≤ 29.9 kg/m <sup>2</sup> )          | 29 (20.4)                            | 121 (37.3)                   |
| Obese ( <i>BMI</i> ≥ 30.0 kg/m <sup>2</sup> )                             | 58 (40.8)                            | 97 (29.9)                    |
| <b>Smoking during pregnancy, n (%)</b>                                    |                                      |                              |
| Yes                                                                       | 39 (27.5)                            | 10 (3.1)                     |
| No                                                                        | 103 (72.5)                           | 314 (96.9)                   |
| <b>Parity, n (%)</b>                                                      |                                      |                              |
| 0                                                                         | 68 (47.9)                            | 94 (29.0)                    |
| 1                                                                         | 43 (30.3)                            | 63 (19.4)                    |
| 2                                                                         | 20 (14.1)                            | 62 (19.1)                    |
| 3+                                                                        | 11 (7.7)                             | 105 (32.4)                   |
| <b>Physical activity levels, n (%)</b>                                    |                                      |                              |
| Inactive                                                                  | 53 (37.3)                            | 254 (78.4)                   |
| Moderately inactive                                                       | 37 (26.1)                            | 41 (12.6)                    |
| Moderately active                                                         | 37 (26.1)                            | 21 (6.5)                     |
| Active                                                                    | 15 (10.6)                            | 8 (2.5)                      |
| <b>Highest educational qualification, n (%)</b>                           |                                      |                              |
| 5 GCSE equivalent or less                                                 | 60 (42.2)                            | 192 (59.3)                   |
| A-level equivalent                                                        | 25 (17.6)                            | 30 (9.3)                     |
| Higher than A-level                                                       | 40 (28.2)                            | 85 (26.2)                    |
| Other/Unknown                                                             | 17 (12.0)                            | 17 (5.2)                     |
| <b>Family history of diabetes, n (%)</b>                                  |                                      |                              |
| Yes                                                                       | 75 (52.8)                            | 221 (68.2)                   |
| No                                                                        | 67 (47.2)                            | 103 (31.8)                   |
| <b>Mother's employment status, n (%)</b>                                  |                                      |                              |
| Currently employed                                                        | 105 (73.9)                           | 65 (20.1)                    |
| Previously employed                                                       | 31 (21.8)                            | 90 (27.8)                    |
| Never employed                                                            | 6 (4.2)                              | 169 (52.2)                   |
| <b>Gestational age at OGTT (weeks), median (IQR)</b>                      | 26.3 (1.1)                           | 26.3 (1.1)                   |
| <b>Fasting glucose concentrations at OGTT (mmol/L), median (IQR)</b>      | 4.7 (0.8)                            | 5.1 (0.9)                    |
| <b>2h post-load glucose concentrations at OGTT (mmol/L), median (IQR)</b> | 8.3 (0.9)                            | 8.6 (1.5)                    |

A-level: UK highest qualification in high school; BMI: body mass index; GCSE: general certificate of secondary education; OGTT: oral glucose tolerance test  
Continuous data presented as median and interquartile range (IQR).  
Categorical data presented as frequencies and percentages.

**Supplementary Table 2** Associations between maternal characteristics and GDM pharmaceutical treatment relative to lifestyle changes advice stratified by maternal ethnicity

|                                                     | White British (N=142)    |       | Pakistani (N=324)        |        |
|-----------------------------------------------------|--------------------------|-------|--------------------------|--------|
|                                                     | Pharmaceutical treatment |       | Pharmaceutical treatment |        |
|                                                     | Adjusted OR<br>(95% CI)  | p     | Adjusted OR<br>(95% CI)  | p      |
| <b>Mother age at childbirth (years)</b>             | 1.1 (1.0, 1.2)           | 0.145 | 1.1 (1.0, 1.2)           | 0.008  |
| <b>BMI categories at booking (kg/m<sup>2</sup>)</b> |                          |       |                          |        |
| Normal weight                                       | <i>Reference</i>         |       | <i>Reference</i>         |        |
| Underweight                                         | 1.1 (0.03, 46.8)         | 0.943 | 1.2 (0.2, 7.0)           | 0.798  |
| Overweight                                          | 1.0 (0.3, 3.4)           | 0.954 | 1.2 (0.6, 2.3)           | 0.546  |
| Obese                                               | 2.1 (0.6, 7.0)           | 0.215 | 4.0 (1.8, 8.8)           | 0.001  |
| <b>Parity</b>                                       |                          |       |                          |        |
| 0                                                   | <i>Reference</i>         |       | <i>Reference</i>         |        |
| 1                                                   | 0.7 (0.2, 2.3)           | 0.613 | 0.5 (0.2, 1.2)           | 0.157  |
| 2                                                   | 0.6 (0.1, 3.5)           | 0.611 | 0.5 (0.2, 1.2)           | 0.152  |
| 3+                                                  | 0.09 (0.01, 0.8)         | 0.027 | 0.6 (0.2, 1.4)           | 0.208  |
| <b>Highest educational qualification</b>            |                          |       |                          |        |
| 5 GCSE equivalent or less                           | <i>Reference</i>         |       | <i>Reference</i>         |        |
| A-level equivalent                                  | 0.5 (0.1, 2.1)           | 0.361 | 0.8 (0.3, 2.2)           | 0.678  |
| Higher than A-level                                 | 0.7 (0.2, 2.6)           | 0.577 | 0.6 (0.3, 1.1)           | 0.122  |
| Other/Unknown                                       | 0.5 (0.1, 2.6)           | 0.417 | 1.1 (0.3, 3.8)           | 0.925  |
| <b>Employment status</b>                            |                          |       |                          |        |
| Currently employed                                  | <i>Reference</i>         |       | <i>Reference</i>         |        |
| Previously employed                                 | 0.5 (0.1, 2.0)           | 0.328 | 1.1 (0.4, 2.6)           | 0.862  |
| Never employed                                      | 0.3 (0.02, 3.7)          | 0.343 | 0.6 (0.2, 1.3)           | 0.190  |
| <b>Physical activity levels</b>                     |                          |       |                          |        |
| Active                                              | <i>Reference</i>         |       | <i>Reference</i>         |        |
| Moderately active                                   | 1.3 (0.3, 5.7)           | 0.737 | 0.3 (0.05, 2.3)          | 0.281  |
| Moderately inactive                                 | 1.7 (0.4, 7.5)           | 0.502 | 1.1 (0.2, 6.6)           | 0.912  |
| Inactive                                            | 3.1 (0.7, 13.5)          | 0.134 | 0.9 (0.1, 4.9)           | 0.883  |
| <b>Smoking during pregnancy</b>                     | 2.1 (0.6, 7.4)           | 0.247 | 3.5 (0.4, 33.6)          | 0.269  |
| <b>Family history of diabetes</b>                   | 2.5 (1.0, 6.7)           | 0.058 | 1.0 (0.5, 1.8)           | >0.999 |
| <b>Gestational age at OGTT (weeks)</b>              | 0.9 (0.7, 1.2)           | 0.605 | 0.9 (0.8, 1.0)           | 0.070  |
| <b>Fasting glucose at OGTT (mmol/L)</b>             | 2.5 (0.9, 6.5)           | 0.066 | 1.7 (1.1, 2.4)           | 0.008  |
| <b>2h post-load glucose at OGTT (mmol/L)</b>        | 2.3 (1.0, 5.3)           | 0.039 | 1.2 (1.0, 1.5)           | 0.049  |

BMI: body mass index; CI: confidence interval; OGTT: oral glucose tolerance test



STROBE Statement—Checklist of items that should be included in reports of *cohort studies*

|                              | Item No | Recommendation                                                                                                                                                                                    | Reported on page # |
|------------------------------|---------|---------------------------------------------------------------------------------------------------------------------------------------------------------------------------------------------------|--------------------|
| <b>Title and abstract</b>    | 1       | (a) Indicate the study's design with a commonly used term in the title or the abstract                                                                                                            | 1                  |
|                              |         | (b) Provide in the abstract an informative and balanced summary of what was done and what was found                                                                                               | 2-3                |
| <b>Introduction</b>          |         |                                                                                                                                                                                                   |                    |
| Background/rationale         | 2       | Explain the scientific background and rationale for the investigation being reported                                                                                                              | 5-6                |
| Objectives                   | 3       | State specific objectives, including any prespecified hypotheses                                                                                                                                  | 6                  |
| <b>Methods</b>               |         |                                                                                                                                                                                                   |                    |
| Study design                 | 4       | Present key elements of study design early in the paper                                                                                                                                           | 6                  |
| Setting                      | 5       | Describe the setting, locations, and relevant dates, including periods of recruitment, exposure, follow-up, and data collection                                                                   | 6-7                |
| Participants                 | 6       | (a) Give the eligibility criteria, and the sources and methods of selection of participants. Describe methods of follow-up                                                                        | 7                  |
|                              |         | (b) For matched studies, give matching criteria and number of exposed and unexposed                                                                                                               | N/A                |
| Variables                    | 7       | Clearly define all outcomes, exposures, predictors, potential confounders, and effect modifiers. Give diagnostic criteria, if applicable                                                          | 8-9                |
| Data sources/<br>measurement | 8*      | For each variable of interest, give sources of data and details of methods of assessment (measurement). Describe comparability of assessment methods if there is more than one group              | 8-9                |
| Bias                         | 9       | Describe any efforts to address potential sources of bias                                                                                                                                         | 10,11              |
| Study size                   | 10      | Explain how the study size was arrived at                                                                                                                                                         | 12                 |
| Quantitative variables       | 11      | Explain how quantitative variables were handled in the analyses. If applicable, describe which groupings were chosen and why                                                                      | 10-11              |
| Statistical methods          | 12      | (a) Describe all statistical methods, including those used to control for confounding                                                                                                             | 10-11              |
|                              |         | (b) Describe any methods used to examine subgroups and interactions                                                                                                                               | 10-11              |
|                              |         | (c) Explain how missing data were addressed                                                                                                                                                       | 10-11              |
|                              |         | (d) If applicable, explain how loss to follow-up was addressed                                                                                                                                    | N/A                |
|                              |         | (e) Describe any sensitivity analyses                                                                                                                                                             | 11                 |
| <b>Results</b>               |         |                                                                                                                                                                                                   |                    |
| Participants                 | 13*     | (a) Report numbers of individuals at each stage of study—eg numbers potentially eligible, examined for eligibility, confirmed eligible, included in the study, completing follow-up, and analysed | 12                 |
|                              |         | (b) Give reasons for non-participation at each stage                                                                                                                                              | 12                 |
|                              |         | (c) Consider use of a flow diagram                                                                                                                                                                | Fig. 1             |
| Descriptive data             | 14*     | (a) Give characteristics of study participants (eg demographic, clinical, social) and information on exposures and potential confounders                                                          | 12                 |
|                              |         | (b) Indicate number of participants with missing data for each variable of interest                                                                                                               | Tables 1, 3        |
|                              |         | (c) Summarise follow-up time (eg, average and total amount)                                                                                                                                       | N/A                |
| Outcome data                 | 15*     | Report numbers of outcome events or summary measures over time                                                                                                                                    | 12, 14             |
| Main results                 | 16      | (a) Give unadjusted estimates and, if applicable, confounder-adjusted estimates and their precision (eg, 95% confidence interval). Make clear which                                               | 13-14              |

|                          |    |                                                                                                                                                                            |       |
|--------------------------|----|----------------------------------------------------------------------------------------------------------------------------------------------------------------------------|-------|
|                          |    | confounders were adjusted for and why they were included                                                                                                                   |       |
|                          |    | (b) Report category boundaries when continuous variables were categorized                                                                                                  | 13-14 |
|                          |    | (c) If relevant, consider translating estimates of relative risk into absolute risk for a meaningful time period                                                           | N/A   |
| Other analyses           | 17 | Report other analyses done—eg analyses of subgroups and interactions, and sensitivity analyses                                                                             | 13    |
| <b>Discussion</b>        |    |                                                                                                                                                                            |       |
| Key results              | 18 | Summarise key results with reference to study objectives                                                                                                                   | 14-15 |
| Limitations              | 19 | Discuss limitations of the study, taking into account sources of potential bias or imprecision. Discuss both direction and magnitude of any potential bias                 | 19    |
| Interpretation           | 20 | Give a cautious overall interpretation of results considering objectives, limitations, multiplicity of analyses, results from similar studies, and other relevant evidence | 15-18 |
| Generalisability         | 21 | Discuss the generalisability (external validity) of the study results                                                                                                      | 19    |
| <b>Other information</b> |    |                                                                                                                                                                            |       |
| Funding                  | 22 | Give the source of funding and the role of the funders for the present study and, if applicable, for the original study on which the present article is based              | 6, 21 |

\*Give information separately for exposed and unexposed groups.

**Note:** An Explanation and Elaboration article discusses each checklist item and gives methodological background and published examples of transparent reporting. The STROBE checklist is best used in conjunction with this article (freely available on the Web sites of PLoS Medicine at <http://www.plosmedicine.org/>, Annals of Internal Medicine at <http://www.annals.org/>, and Epidemiology at <http://www.epidem.com/>). Information on the STROBE Initiative is available at <http://www.strobe-statement.org>.
