# Supplementary material for: Associations between maternal characteristics and pharmaceutical treatment of gestational diabetes: an analysis of the UK Born in Bradford (BiB) cohort study
Source: PubMed Central journal article supplement (PMC8572403; doi:10.1136/bmjopen-2021-053753), 2021-11-03
Supplement: bmjopen-2021-053753supp001.pdf [file bmjopen-2021-053753supp001.pdf]

**Supplementary Table 1** Maternal characteristics by maternal ethnicity

|                                                                            | <b>White British<br/>(n=142)</b> | <b>Pakistani<br/>(n=324)</b> |
|----------------------------------------------------------------------------|----------------------------------|------------------------------|
| <b>GDM treatment, n (%)</b>                                                |                                  |                              |
| Lifestyle changes advice alone                                             | 37 (26.1)                        | 111 (34.3)                   |
| Pharmaceutical treatment                                                   | 105 (73.9)                       | 213 (65.7)                   |
| <b>Age at childbirth (years), median (IQR)</b>                             | 30.0 (9.4)                       | 30.8 (7.4)                   |
| <b>BMI at booking (kg/m<sup>2</sup>), median (IQR)</b>                     | 27.9 (10.5)                      | 26.9 (7.1)                   |
| <b>BMI category at booking, n (%)</b>                                      |                                  |                              |
| Underweight ( <i>BMI</i> < 18.5 kg/m <sup>2</sup> )                        | 2 (1.4)                          | 7 (2.2)                      |
| Normal weight ( <i>18.5</i> ≤ <i>BMI</i> ≤ <i>24.9</i> kg/m <sup>2</sup> ) | 53 (37.3)                        | 99 (30.6)                    |
| Overweight ( <i>25.0</i> ≤ <i>BMI</i> ≤ <i>29.9</i> kg/m <sup>2</sup> )    | 29 (20.4)                        | 121 (37.3)                   |
| Obese ( <i>BMI</i> ≥ <i>30.0</i> kg/m <sup>2</sup> )                       | 58 (40.8)                        | 97 (29.9)                    |
| <b>Smoking during pregnancy, n (%)</b>                                     |                                  |                              |
| Yes                                                                        | 39 (27.5)                        | 10 (3.1)                     |
| No                                                                         | 103 (72.5)                       | 314 (96.9)                   |
| <b>Parity, n (%)</b>                                                       |                                  |                              |
| 0                                                                          | 68 (47.9)                        | 94 (29.0)                    |
| 1                                                                          | 43 (30.3)                        | 63 (19.4)                    |
| 2                                                                          | 20 (14.1)                        | 62 (19.1)                    |
| 3+                                                                         | 11 (7.7)                         | 105 (32.4)                   |
| <b>Physical activity levels, n (%)</b>                                     |                                  |                              |
| Inactive                                                                   | 53 (37.3)                        | 254 (78.4)                   |
| Moderately inactive                                                        | 37 (26.1)                        | 41 (12.6)                    |
| Moderately active                                                          | 37 (26.1)                        | 21 (6.5)                     |
| Active                                                                     | 15 (10.6)                        | 8 (2.5)                      |
| <b>Highest educational qualification, n (%)</b>                            |                                  |                              |
| 5 GCSE equivalent or less                                                  | 60 (42.2)                        | 192 (59.3)                   |
| A-level equivalent                                                         | 25 (17.6)                        | 30 (9.3)                     |
| Higher than A-level                                                        | 40 (28.2)                        | 85 (26.2)                    |
| Other/Unknown                                                              | 17 (12.0)                        | 17 (5.2)                     |
| <b>Family history of diabetes, n (%)</b>                                   |                                  |                              |
| Yes                                                                        | 75 (52.8)                        | 221 (68.2)                   |
| No                                                                         | 67 (47.2)                        | 103 (31.8)                   |
| <b>Mother's employment status, n (%)</b>                                   |                                  |                              |
| Currently employed                                                         | 105 (73.9)                       | 65 (20.1)                    |
| Previously employed                                                        | 31 (21.8)                        | 90 (27.8)                    |
| Never employed                                                             | 6 (4.2)                          | 169 (52.2)                   |
| <b>Gestational age at OGTT (weeks), median (IQR)</b>                       | 26.3 (1.1)                       | 26.3 (1.1)                   |
| <b>Fasting glucose concentrations at OGTT (mmol/L), median (IQR)</b>       | 4.7 (0.8)                        | 5.1 (0.9)                    |
| <b>2h post-load glucose concentrations at OGTT (mmol/L), median (IQR)</b>  | 8.3 (0.9)                        | 8.6 (1.5)                    |

A-level: UK highest qualification in high school; BMI: body mass index; GCSE: general certificate of secondary education; OGTT: oral glucose tolerance test  
Continuous data presented as median and interquartile range (IQR).  
Categorical data presented as frequencies and percentages.

**Supplementary Table 2** Associations between maternal characteristics and GDM pharmaceutical treatment relative to lifestyle changes advice stratified by maternal ethnicity

|                                                     | White British (N=142)          |          | Pakistani (N=324)              |          |
|-----------------------------------------------------|--------------------------------|----------|--------------------------------|----------|
|                                                     | Pharmaceutical treatment       |          | Pharmaceutical treatment       |          |
|                                                     | <i>Adjusted OR</i><br>(95% CI) | <i>p</i> | <i>Adjusted OR</i><br>(95% CI) | <i>p</i> |
| <b>Mother age at childbirth (years)</b>             | 1.1 (1.0, 1.2)                 | 0.145    | 1.1 (1.0, 1.2)                 | 0.008    |
| <b>BMI categories at booking (kg/m<sup>2</sup>)</b> |                                |          |                                |          |
| Normal weight                                       | <i>Reference</i>               |          | <i>Reference</i>               |          |
| Underweight                                         | 1.1 (0.03, 46.8)               | 0.943    | 1.2 (0.2, 7.0)                 | 0.798    |
| Overweight                                          | 1.0 (0.3, 3.4)                 | 0.954    | 1.2 (0.6, 2.3)                 | 0.546    |
| Obese                                               | 2.1 (0.6, 7.0)                 | 0.215    | 4.0 (1.8, 8.8)                 | 0.001    |
| <b>Parity</b>                                       |                                |          |                                |          |
| 0                                                   | <i>Reference</i>               |          | <i>Reference</i>               |          |
| 1                                                   | 0.7 (0.2, 2.3)                 | 0.613    | 0.5 (0.2, 1.2)                 | 0.157    |
| 2                                                   | 0.6 (0.1, 3.5)                 | 0.611    | 0.5 (0.2, 1.2)                 | 0.152    |
| 3+                                                  | 0.09 (0.01, 0.8)               | 0.027    | 0.6 (0.2, 1.4)                 | 0.208    |
| <b>Highest educational qualification</b>            |                                |          |                                |          |
| 5 GCSE equivalent or less                           | <i>Reference</i>               |          | <i>Reference</i>               |          |
| A-level equivalent                                  | 0.5 (0.1, 2.1)                 | 0.361    | 0.8 (0.3, 2.2)                 | 0.678    |
| Higher than A-level                                 | 0.7 (0.2, 2.6)                 | 0.577    | 0.6 (0.3, 1.1)                 | 0.122    |
| Other/Unknown                                       | 0.5 (0.1, 2.6)                 | 0.417    | 1.1 (0.3, 3.8)                 | 0.925    |
| <b>Employment status</b>                            |                                |          |                                |          |
| Currently employed                                  | <i>Reference</i>               |          | <i>Reference</i>               |          |
| Previously employed                                 | 0.5 (0.1, 2.0)                 | 0.328    | 1.1 (0.4, 2.6)                 | 0.862    |
| Never employed                                      | 0.3 (0.02, 3.7)                | 0.343    | 0.6 (0.2, 1.3)                 | 0.190    |
| <b>Physical activity levels</b>                     |                                |          |                                |          |
| Active                                              | <i>Reference</i>               |          | <i>Reference</i>               |          |
| Moderately active                                   | 1.3 (0.3, 5.7)                 | 0.737    | 0.3 (0.05, 2.3)                | 0.281    |
| Moderately inactive                                 | 1.7 (0.4, 7.5)                 | 0.502    | 1.1 (0.2, 6.6)                 | 0.912    |
| Inactive                                            | 3.1 (0.7, 13.5)                | 0.134    | 0.9 (0.1, 4.9)                 | 0.883    |
| <b>Smoking during pregnancy</b>                     | 2.1 (0.6, 7.4)                 | 0.247    | 3.5 (0.4, 33.6)                | 0.269    |
| <b>Family history of diabetes</b>                   | 2.5 (1.0, 6.7)                 | 0.058    | 1.0 (0.5, 1.8)                 | >0.999   |
| <b>Gestational age at OGTT (weeks)</b>              | 0.9 (0.7, 1.2)                 | 0.605    | 0.9 (0.8, 1.0)                 | 0.070    |
| <b>Fasting glucose at OGTT (mmol/L)</b>             | 2.5 (0.9, 6.5)                 | 0.066    | 1.7 (1.1, 2.4)                 | 0.008    |
| <b>2h post-load glucose at OGTT (mmol/L)</b>        | 2.3 (1.0, 5.3)                 | 0.039    | 1.2 (1.0, 1.5)                 | 0.049    |

BMI: body mass index; CI: confidence interval; OGTT: oral glucose tolerance test
